# Supplementary material for: Cu(ii), Mn(ii) and Zn(ii) complexes of hydrazones with a quaternary ammonium moiety: synthesis, experimental and theoretical characterization and cytotoxic activity
Source: Royal Society of Chemistry journal article supplement (doi:10.1039/d1dt03169d), 2021-11-23
Supplement: d1dt03169d1.pdf [file d1dt03169d1.pdf]

## SUPPORTING INFORMATION

### **Cu(II), Mn(II) and Zn(II) complexes of hydrazones with quaternary ammonium moiety: synthesis, experimental and theoretical characterization and cytotoxic activity**

Nevena Stevanović,<sup>1</sup> Matija Zlatař,<sup>2</sup> Irena Novaković,<sup>b</sup> Andrej Pevec,<sup>3</sup> Dušanka Radanović,<sup>b</sup> Ivana Z. Matić,<sup>4</sup> Marija Đorđić Crnogorac,<sup>d</sup> Tatjana Stanojković,<sup>d</sup> Miroslava Vujčić,<sup>b</sup> Maja Gruden,<sup>a</sup> Dušan Sladić,<sup>a</sup> Katarina Anđelković,<sup>a</sup> Iztok Turel,<sup>c,\*</sup> Božidar Čobeljić<sup>a,\*</sup>

**Table S1** Selected bond distances (Å) and angles (°) in [CuL<sup>1</sup>(N<sub>3</sub>)(CH<sub>3</sub>OH)]BF<sub>4</sub>

|           |          |            |          |
|-----------|----------|------------|----------|
| Cu1–N5    | 1.922(2) | N2–N3      | 1.377(3) |
| Cu1–N2    | 1.928(2) | N5–N6      | 1.209(3) |
| Cu1–O1    | 1.970(2) | N6–N7      | 1.131(3) |
| Cu1–N1    | 2.048(2) | B1–F1A     | 1.351(9) |
| Cu1–O2    | 2.533(2) | B1–F2A     | 1.430(1) |
| O1–C6     | 1.276(3) | B1–F3A     | 1.380(1) |
| N2–C4     | 1.298(3) | B1–F4A     | 1.320(1) |
| N3–C6     | 1.321(3) | B1–F1B     | 1.370(2) |
|           |          | B1–F2B     | 1.240(2) |
|           |          | B1–F3B     | 1.260(2) |
|           |          | B1–F4B     | 1.390(2) |
| N5–Cu1–O1 | 98.51(9) | N6–N5–Cu1  | 122.1(2) |
| N2–Cu1–O1 | 79.33(8) | N7–N6–N5   | 176.2(3) |
| N5–Cu1–N1 | 100.8(1) | F1A–B1–F4A | 117.0(8) |
| N2–Cu1–N1 | 80.73(9) | F1A–B1–F3A | 106.2(7) |

<sup>1</sup>University of Belgrade-Faculty of Chemistry, Studentski trg 12–16, 11000 Belgrade, Serbia  
E-mail: bozidar@chem.bg.ac.rs (B. Čobeljić)

<sup>2</sup>University of Belgrade-Institute of Chemistry, Technology and Metallurgy, Department of Chemistry, Njegoševa 12, 11000 Belgrade, Serbia

<sup>3</sup>Faculty of Chemistry and Chemical Technology, University of Ljubljana, Večna pot 113, 1000 Ljubljana, Slovenia  
E-mail: Iztok.Turel@fkkt.uni-lj.si (I. Turel)

<sup>4</sup>Institute of Oncology and Radiology of Serbia, 11000 Belgrade, Serbia

|           |           |            |           |
|-----------|-----------|------------|-----------|
| O1–Cu1–O2 | 88.83(8)  | F4A–B1–F3A | 115.9(8)  |
| N1–Cu1–O2 | 95.92(8)  | F1A–B1–F2A | 108.0(6)  |
| N2–Cu1–O2 | 85.37(8)  | F4A–B1–F2A | 104.9(7)  |
| N5–Cu1–O2 | 99.34(9)  | F3A–B1–F2A | 103.7(7)  |
| N5–Cu1–N2 | 174.8(1)  | F2B–B1–F1B | 111.1(12) |
| O1–Cu1–N1 | 159.05(9) | F3B–B1–F1B | 110.2(13) |
|           |           | F1B–B1–F4B | 102.9(10) |
|           |           | F2B–B1–F3B | 111.6(15) |
|           |           | F2B–B1–F4B | 120.9(12) |
|           |           | F3B–B1–F4B | 99.3(18)  |

**Table S2** Selected bond distances (Å) and angles (°) in  $[\text{Mn}_2\text{L}^1_2(\mu\text{-}_{1,1}\text{-N}_3)_2(\text{N}_3)_2]\cdot 2\text{CH}_3\text{OH}$

|                         |            |                         |            |
|-------------------------|------------|-------------------------|------------|
| Mn1–N8                  | 2.112(2)   | N2–C4                   | 1.288(3)   |
| Mn1–O1                  | 2.1879(16) | N2–N3                   | 1.393(2)   |
| Mn1–N5                  | 2.229(2)   | N3–C6                   | 1.330(3)   |
| Mn1–N5 <sup>#</sup>     | 2.2425(19) | N5–N6                   | 1.193(3)   |
| Mn1–N2                  | 2.2500(18) | N6–N7                   | 1.142(3)   |
| Mn1–N1                  | 2.3668(19) | N8–N9                   | 1.169(3)   |
| O1–C6                   | 1.264(3)   | N9–N10                  | 1.149(4)   |
| N8–Mn1–O1               | 98.88(9)   | O1–Mn1–N1               | 134.91(7)  |
| N8–Mn1–N5               | 147.86(10) | N5–Mn1–N1               | 87.04(7)   |
| O1–Mn1–N5               | 107.66(8)  | N5 <sup>#</sup> –Mn1–N1 | 138.40(8)  |
| N8–Mn1–N5 <sup>#</sup>  | 91.69(9)   | N2–Mn1–N1               | 69.46(7)   |
| O1–Mn1–N5 <sup>#</sup>  | 86.40(8)   | N6–N5–Mn1               | 126.85(16) |
| N5–Mn1–N5 <sup>#</sup>  | 72.63(8)   | N10–N9–N8               | 176.0(3)   |
| N8–Mn1–N2               | 121.21(9)  | N9–N8–Mn1               | 137.7(2)   |
| O1–Mn1–N2               | 69.51(6)   | N7–N6–N5                | 179.4(3)   |
| N5–Mn1–N2               | 85.67(7)   | Mn1–N5–Mn1 <sup>#</sup> | 107.37(8)  |
| N5 <sup>#</sup> –Mn1–N2 | 141.02(8)  | N6–N5–Mn1 <sup>#</sup>  | 123.06(15) |
| N8–Mn1–N1               | 86.84(9)   |                         |            |

Symmetry code # = 1–x, 1–y, 1–z.

**Table S3** Selected bond distances (Å) and angles (°) in [ZnL<sup>1</sup>(N<sub>3</sub>)<sub>2</sub>]

|           |            |           |            |
|-----------|------------|-----------|------------|
| Zn1–N5    | 1.965(4)   | N2–N3     | 1.377(4)   |
| Zn1–N8    | 2.019(6)   | N5–N6     | 1.161(6)   |
| Zn1–N2    | 2.064(3)   | N6–N7     | 1.158(6)   |
| Zn1–N1    | 2.209(3)   | N8–N9     | 0.899(5)   |
| Zn1–O1    | 2.230(2)   | N9–N10    | 1.212(6)   |
| N2–C4     | 1.304(4)   | O1–C6     | 1.244(4)   |
| N3–C6     | 1.323(4)   |           |            |
| N5–Zn1–N8 | 115.1(2)   | N8–Zn1–O1 | 97.18(16)  |
| N5–Zn1–N2 | 121.42(17) | N2–Zn1–O1 | 73.08(10)  |
| N8–Zn1–N2 | 123.30(18) | N1–Zn1–O1 | 149.06(12) |
| N5–Zn1–N1 | 102.84(15) | N6–N5–Zn1 | 122.5(3)   |
| N8–Zn1–N1 | 96.46(17)  | N7–N6–N5  | 178.5(6)   |
| N2–Zn1–N1 | 76.21(13)  | N9–N8–Zn1 | 122.7(5)   |
| N5–Zn1–O1 | 96.26(14)  | N8–N9–N10 | 169.2(7)   |

**Table S4** Hydrogen bond parameters (Å, °) for [CuL<sup>1</sup>(N<sub>3</sub>)(CH<sub>3</sub>OH)]BF<sub>4</sub> complex

| D–H...A           | D–H (Å) | H...A (Å) | D...A (Å) | D–H...A (°) | Sym. code on A    |
|-------------------|---------|-----------|-----------|-------------|-------------------|
| O2–H2A...N5       | 0.82    | 2.00      | 2.809(3)  | 170         | 1–x, 1–y, –z      |
| C7–H7A...F1A      | 0.97    | 2.35      | 3.288(11) | 162         | ½ –x, –½ +y, ½ –z |
| C9–H9A...F1A      | 0.96    | 2.29      | 3.220(10) | 164         |                   |
| C10–H10C...F2A    | 0.96    | 2.52      | 3.397(11) | 152         | –1+x, y, z        |
| C2–H2...F2B       | 0.93    | 2.52      | 3.262(18) | 137         | 1–x, 1–y, –z      |
| C5–H5B...F3B      | 0.96    | 2.53      | 3.40(3)   | 151         | x, –1+y, z        |
| C7–H7A...F1B      | 0.97    | 2.31      | 3.28(3)   | 177         | ½ –x, –½ +y, ½ –z |
| C9–H9A...F1B      | 0.96    | 2.54      | 3.41(3)   | 150         |                   |
| Intra C5–H5A...N3 | 0.96    | 2.52      | 2.919(4)  | 105         |                   |
| Intra C9–H9C...O1 | 0.96    | 2.28      | 2.930(4)  | 124         |                   |

**Table S5** Hydrogen bond parameters (Å,°) for [Mn<sub>2</sub>L<sup>1</sup><sub>2</sub>(μ<sub>-1,1</sub>-N<sub>3</sub>)<sub>2</sub>(N<sub>3</sub>)<sub>2</sub>] $\cdot$ 2CH<sub>3</sub>OH complex

| D–H...A             | D–H (Å) | H...A (Å) | D...A (Å) | D–H...A (°) | Sym. code on A |
|---------------------|---------|-----------|-----------|-------------|----------------|
| O2–H2A...N3         | 0.82    | 2.03      | 2.835(3)  | 168         |                |
| C7–H7B...O2         | 0.97    | 2.40      | 3.298(4)  | 155         | 1–x, 2–y, 2–z  |
| C9–H9B...N8         | 0.96    | 2.53      | 3.406(5)  | 151         | –x, 1–y, 1–z   |
| C9–H9C...O2         | 0.96    | 2.45      | 3.290(5)  | 147         | 1–x, 2–y, 2–z  |
| C10–H10B...O1       | 0.96    | 2.55      | 3.491(4)  | 165         | –x, 1–y, 1–z   |
| Intra C5–H5A...N3   | 0.96    | 2.51      | 2.878(4)  | 103         |                |
| Intra C10–H10A...O1 | 0.96    | 2.37      | 2.978(4)  | 121         |                |

**Table S6** Hydrogen bond parameters (Å,°) for [ZnL<sup>1</sup>(N<sub>3</sub>)<sub>2</sub>] complex

| D–H...A           | D–H (Å) | H...A (Å) | D...A (Å) | D–H...A (°) | Sym. code on A    |
|-------------------|---------|-----------|-----------|-------------|-------------------|
| C7–H7A...N10      | 0.97    | 2.38      | 3.334(6)  | 166         | –x, 1/2+y, –1/2–z |
| Intra C9–H9A...N3 | 0.96    | 2.37      | 3.015(5)  | 124         |                   |
| C10–H10C...O1     | 0.96    | 2.55      | 3.437(5)  | 154         | –x, 2–y, –z       |

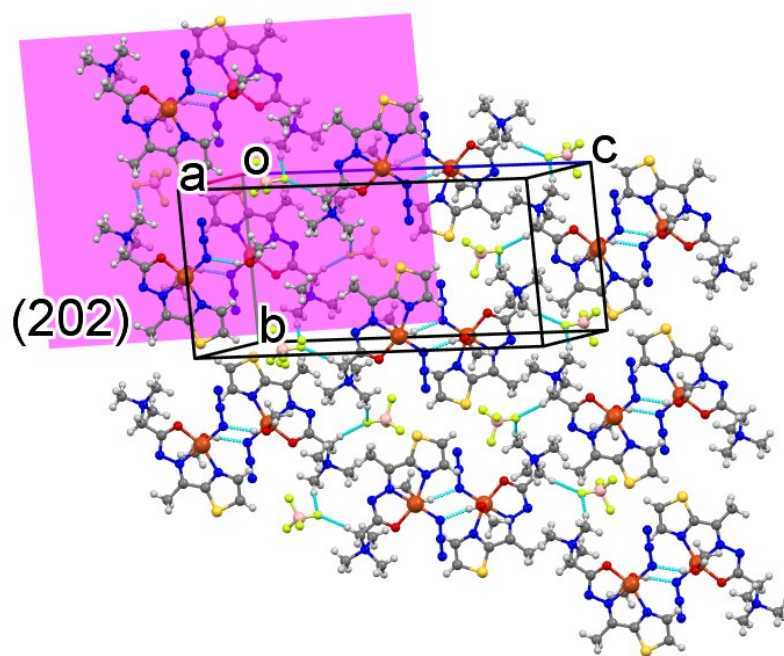

(a)

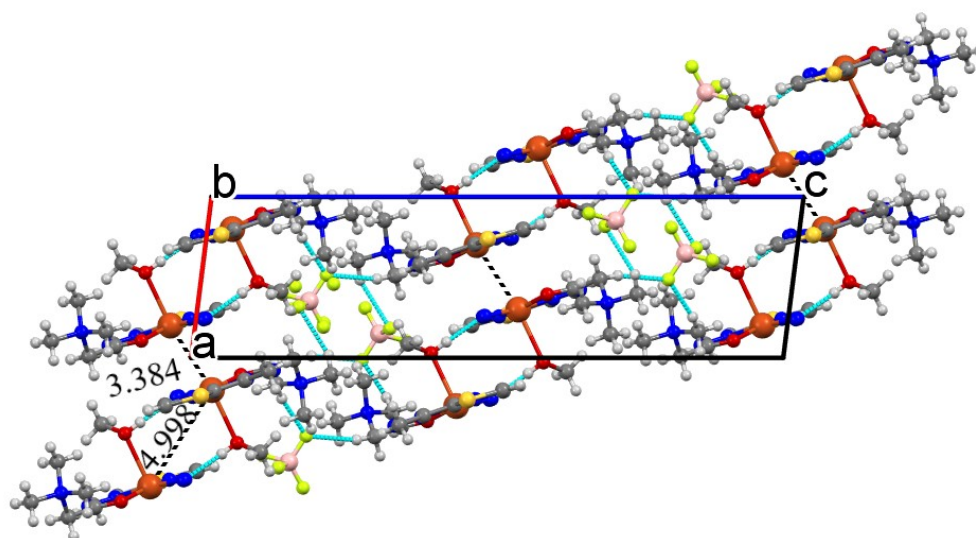

(b)

**Fig. S1** (a) A view of the crystal packing of **1** showing hydrogen bonded dimers connected by means of intermolecular C–H···F hydrogen bonds (dashed blue lines) into (202) layers. (b) View of the neighboring (202) layers connected by means of intermolecular C–H···F hydrogen bonds. The intermolecular hydrogen bonds involving the major component of disordered  $\text{BF}_4^-$  anion are only considered.

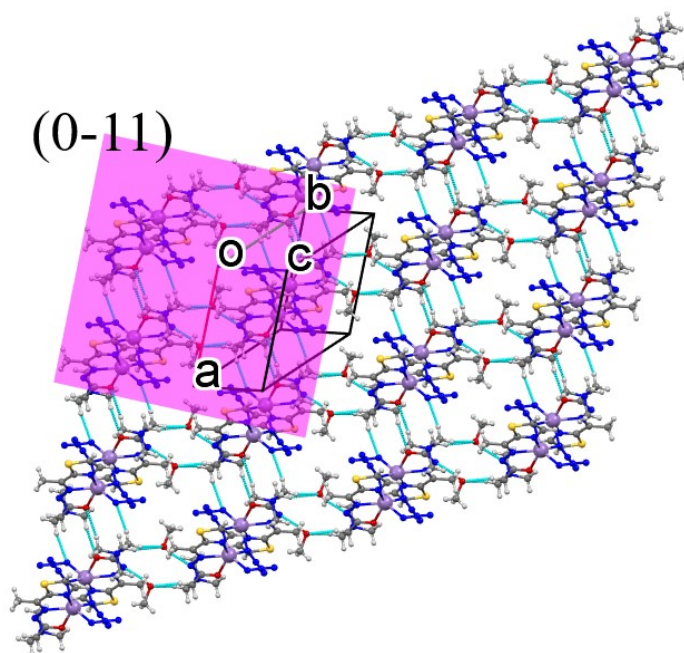

**Fig. S2** A view of the crystal packing of **2** showing hydrogen bonded chains parallel with  $[100]$  connected by intermolecular  $O-H\cdots N$  and  $C-H\cdots O$  hydrogen bonds into  $(0-11)$  layers.

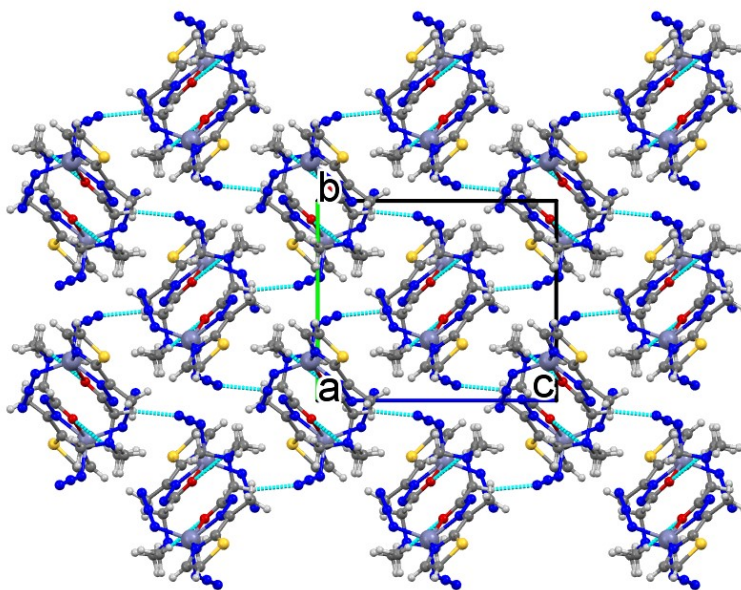

**Fig. S3** A view of the crystal packing of **3** showing complex molecules connected by means of intermolecular hydrogen bonds  $C-H\cdots N$  and  $C-H\cdots O$  (dashed blue lines) into layer parallel with the  $(1\ 0\ 0)$  lattice plane. The molecules of **3** form dimers by means of  $C-H\cdots O$  hydrogen bonds.

Fig. S4 IR spectra of  $\text{HL}^1\text{Cl}$ .

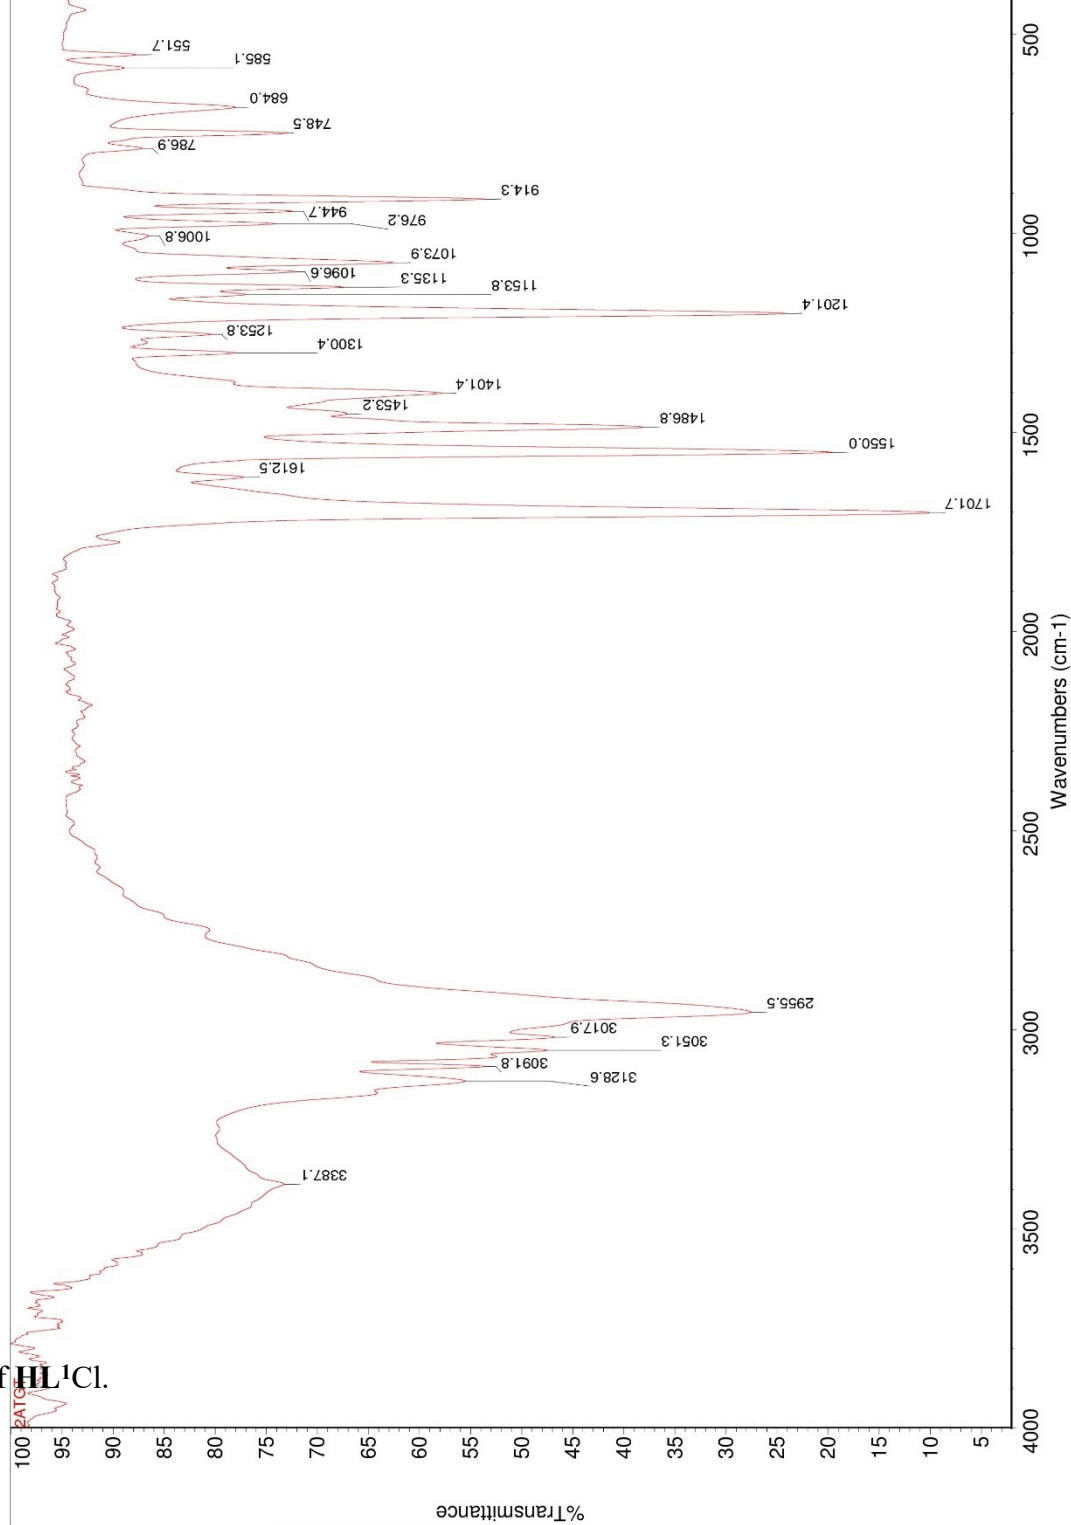

Fig. S5 IR spectra of 1

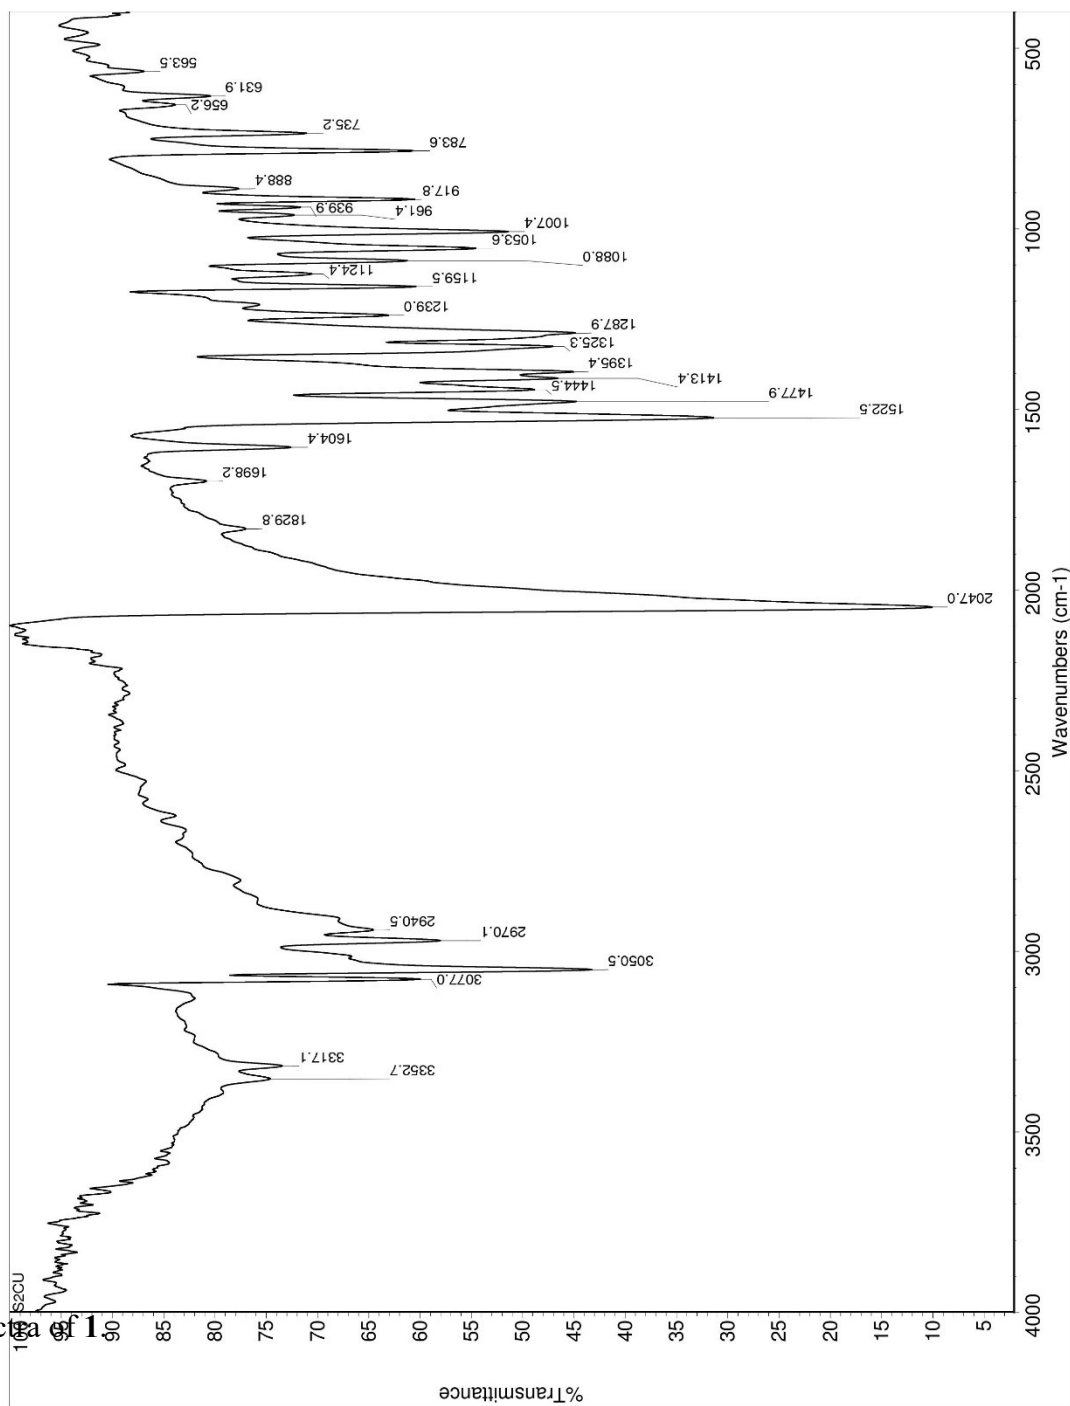



Fig. S6 IR spectra of 2

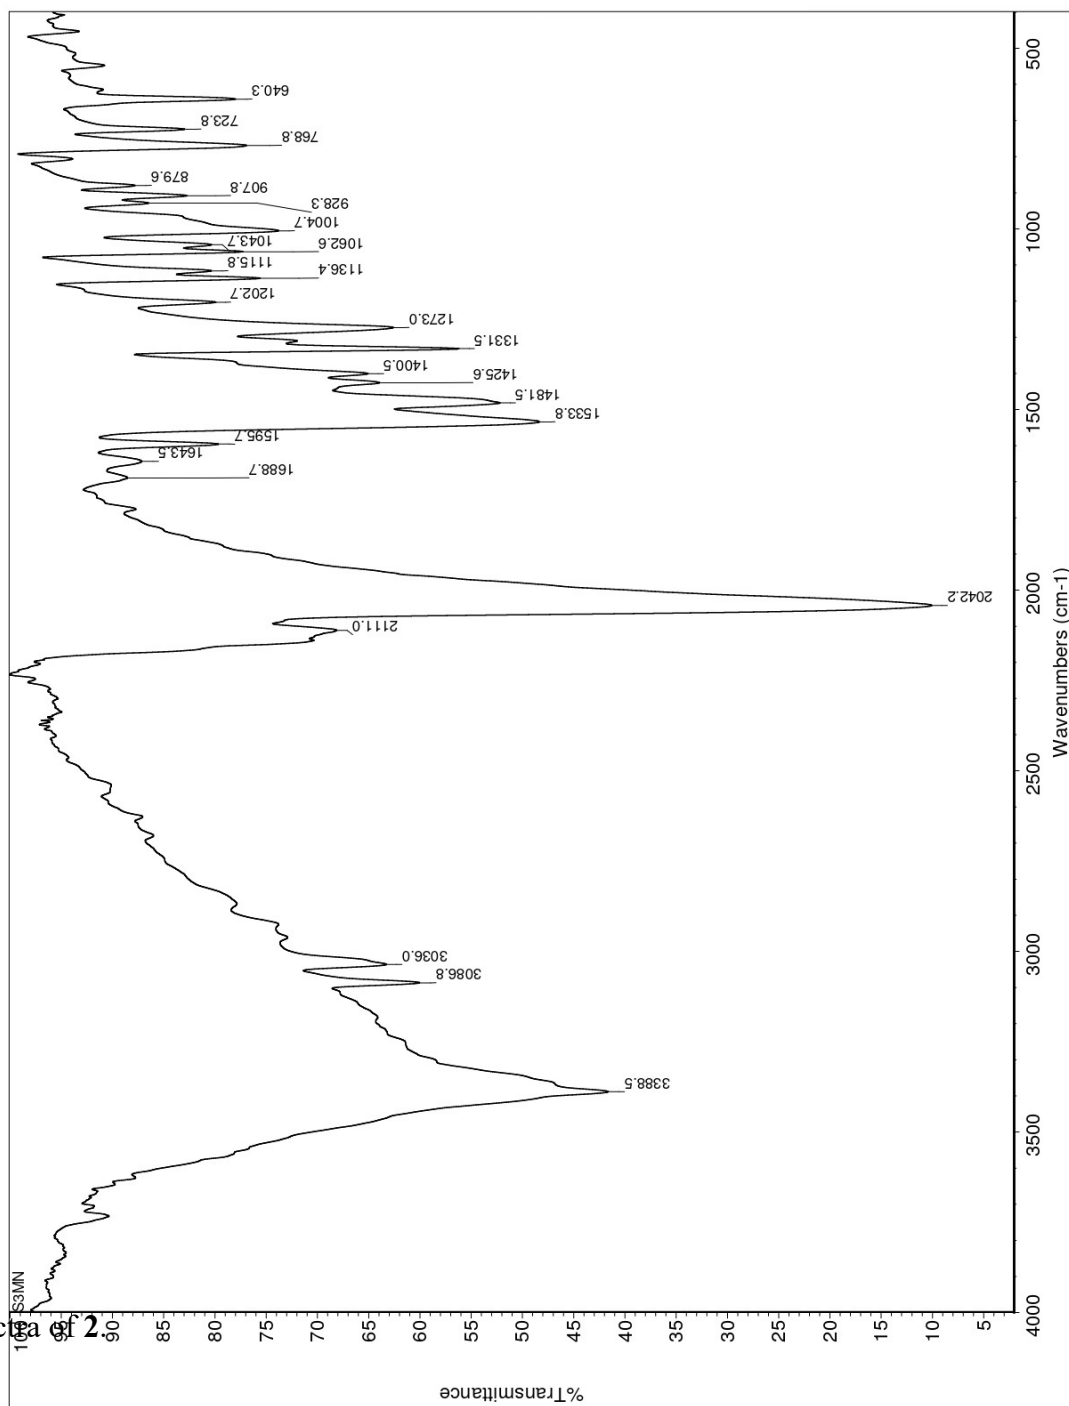

Fig. S7 IR spectra of **3**

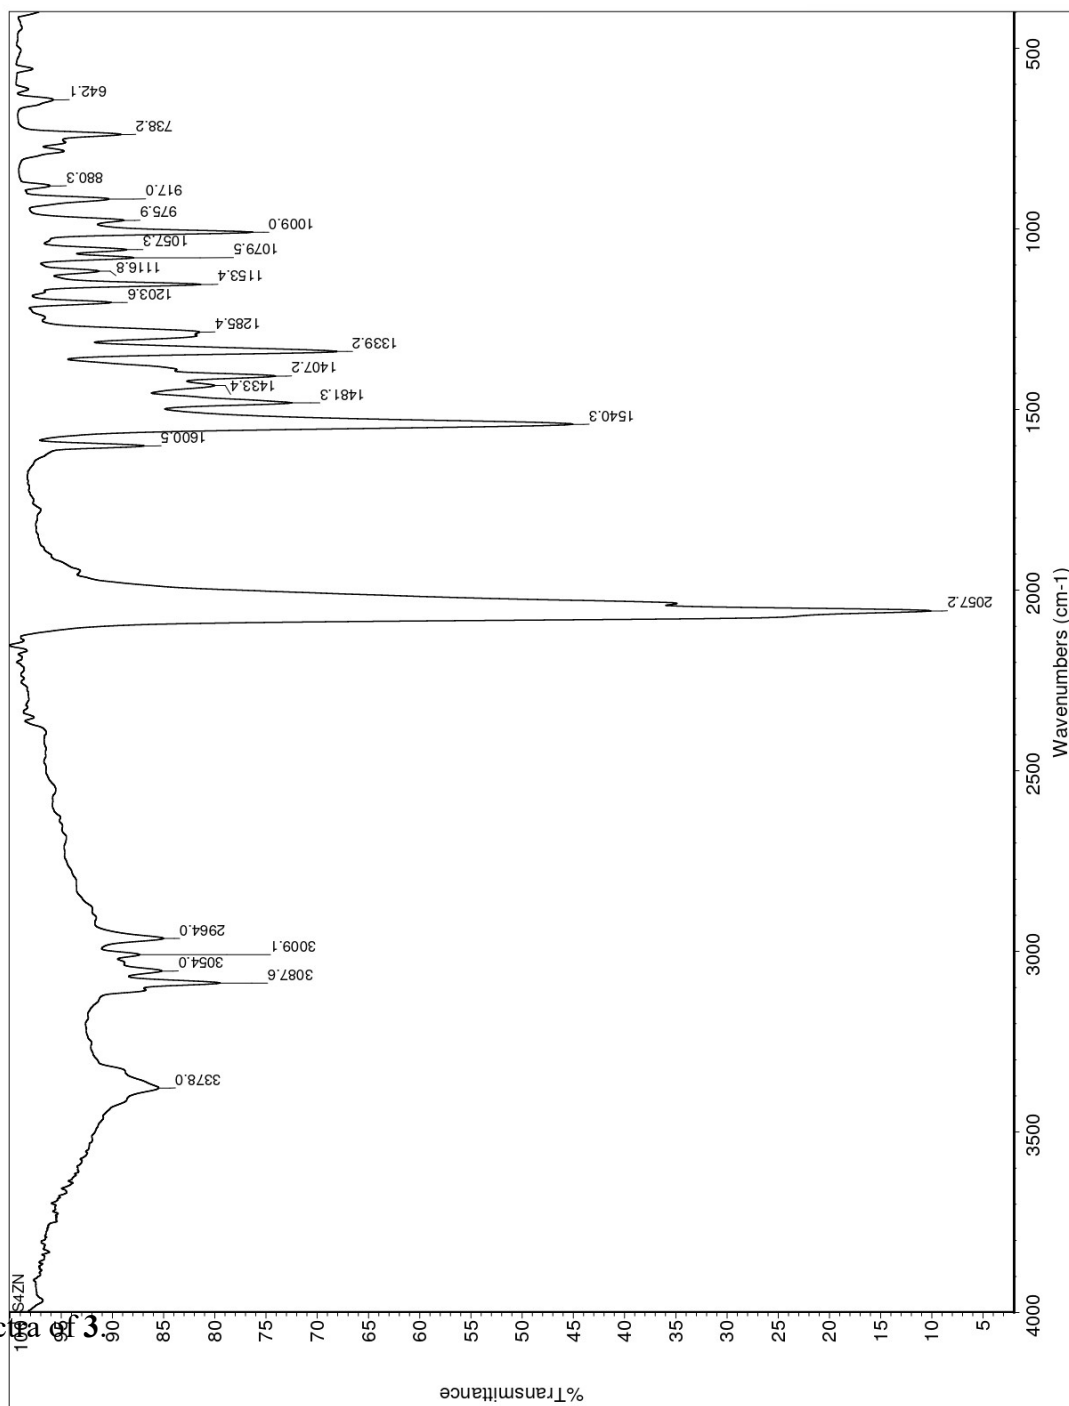

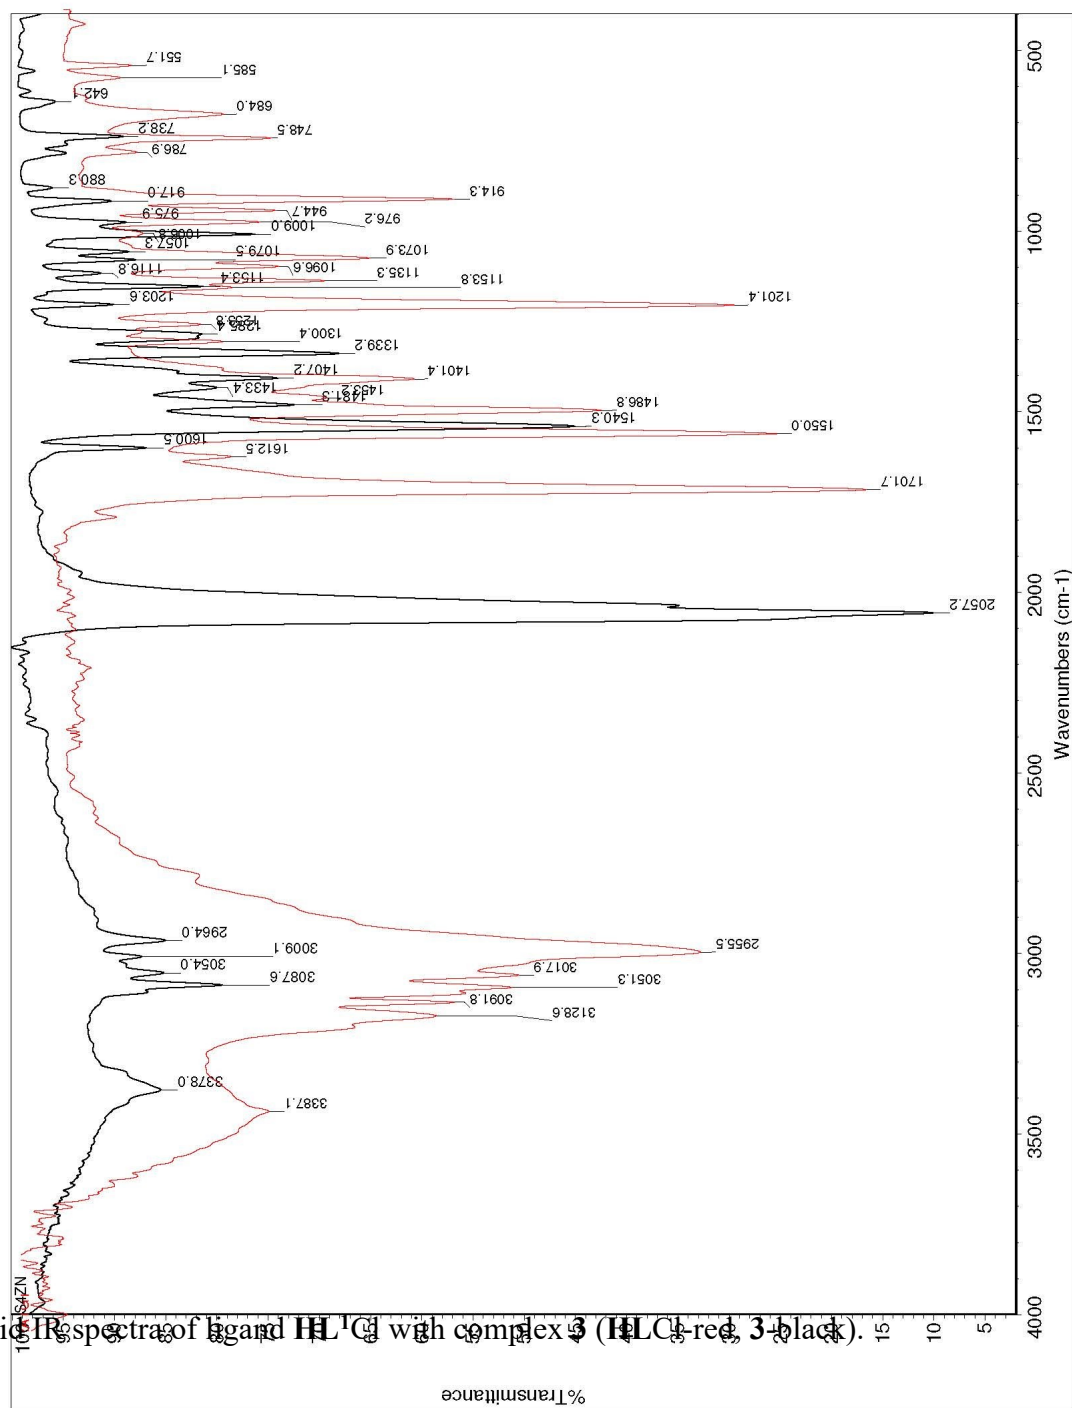

Fig. S8 Overlaid IR Spectra of ligand HLCl with complex 3 (HLCl, red, 3, black).

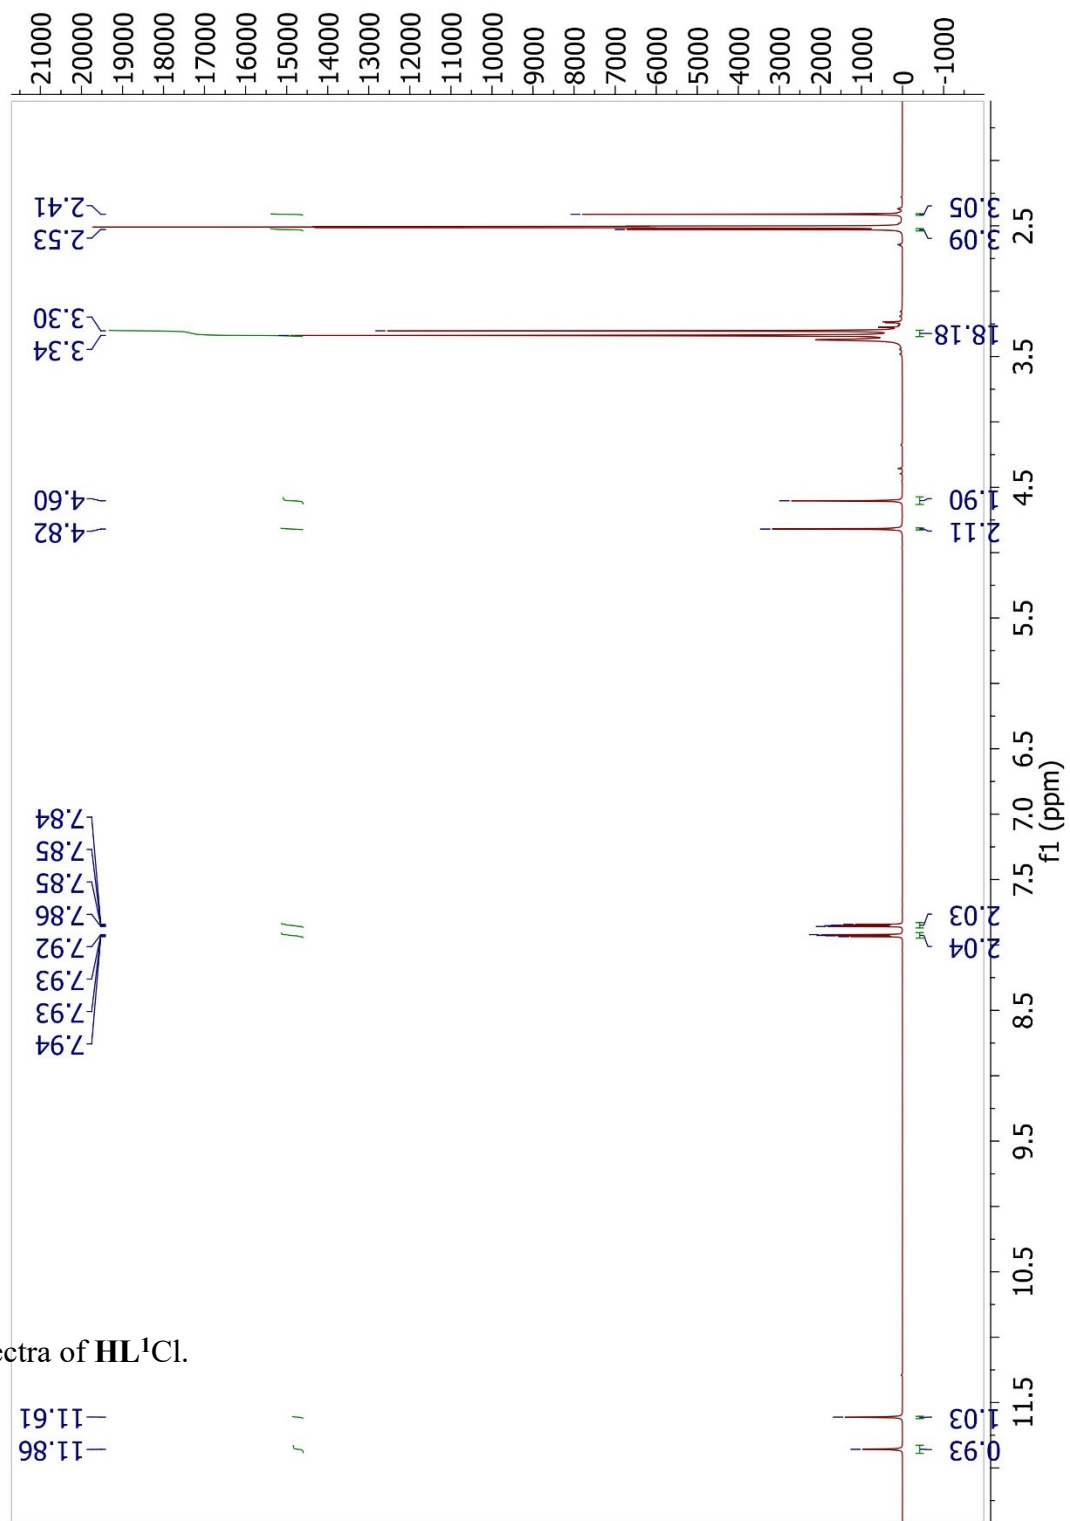

**Fig. S8**  $^1\text{H}$  NMR spectra of  $\text{HL}^1\text{Cl}$ .

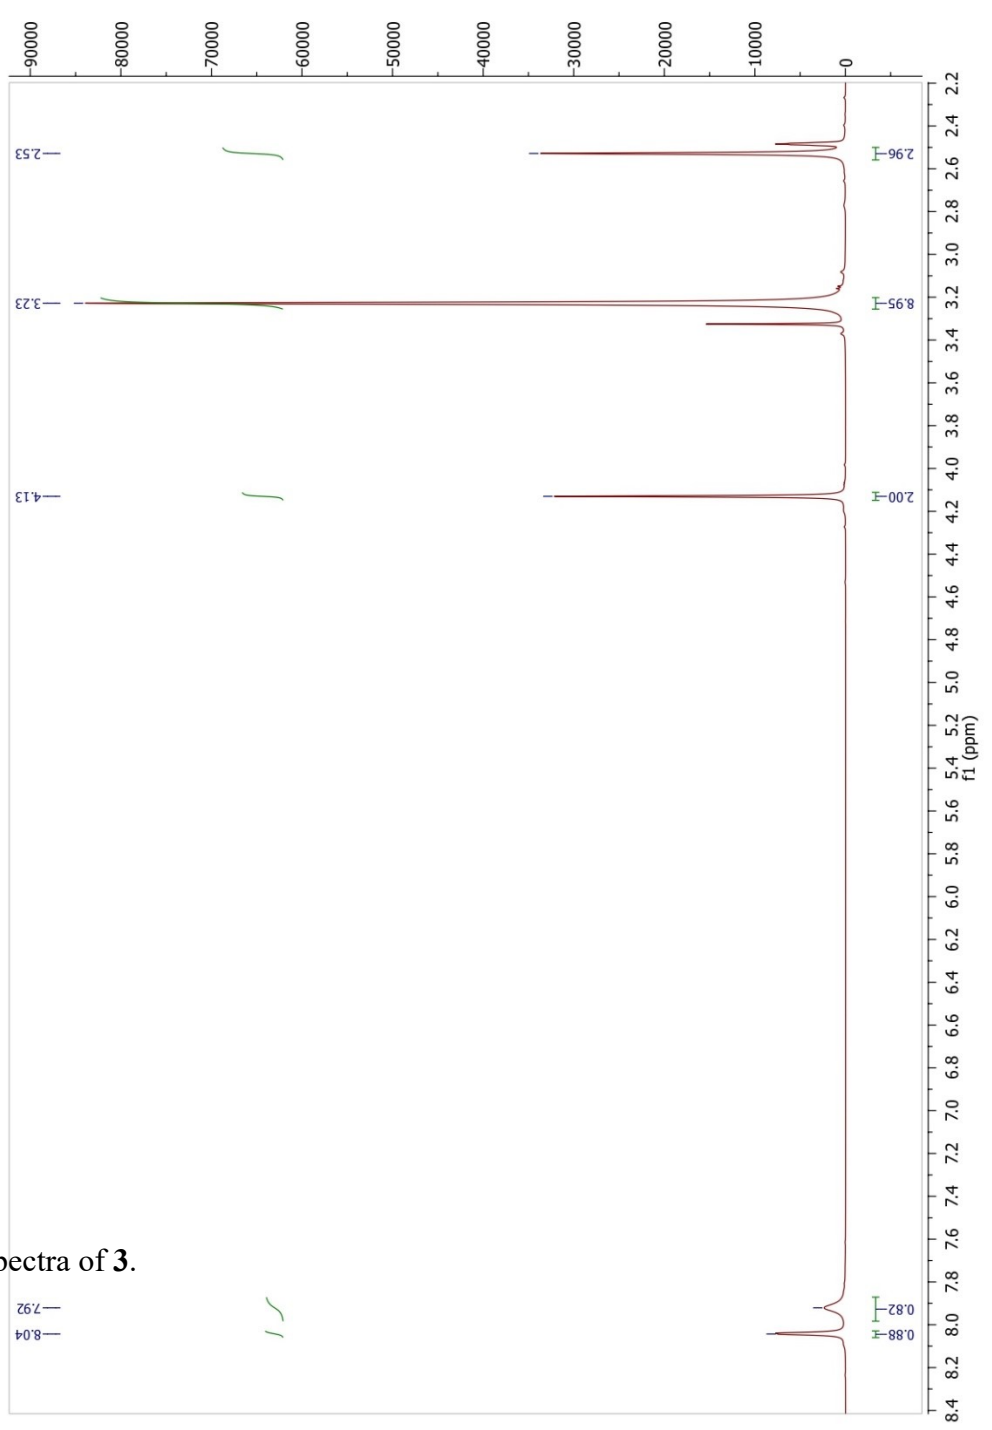

**Fig. S9**  $^1\text{H}$  NMR spectra of **3**.

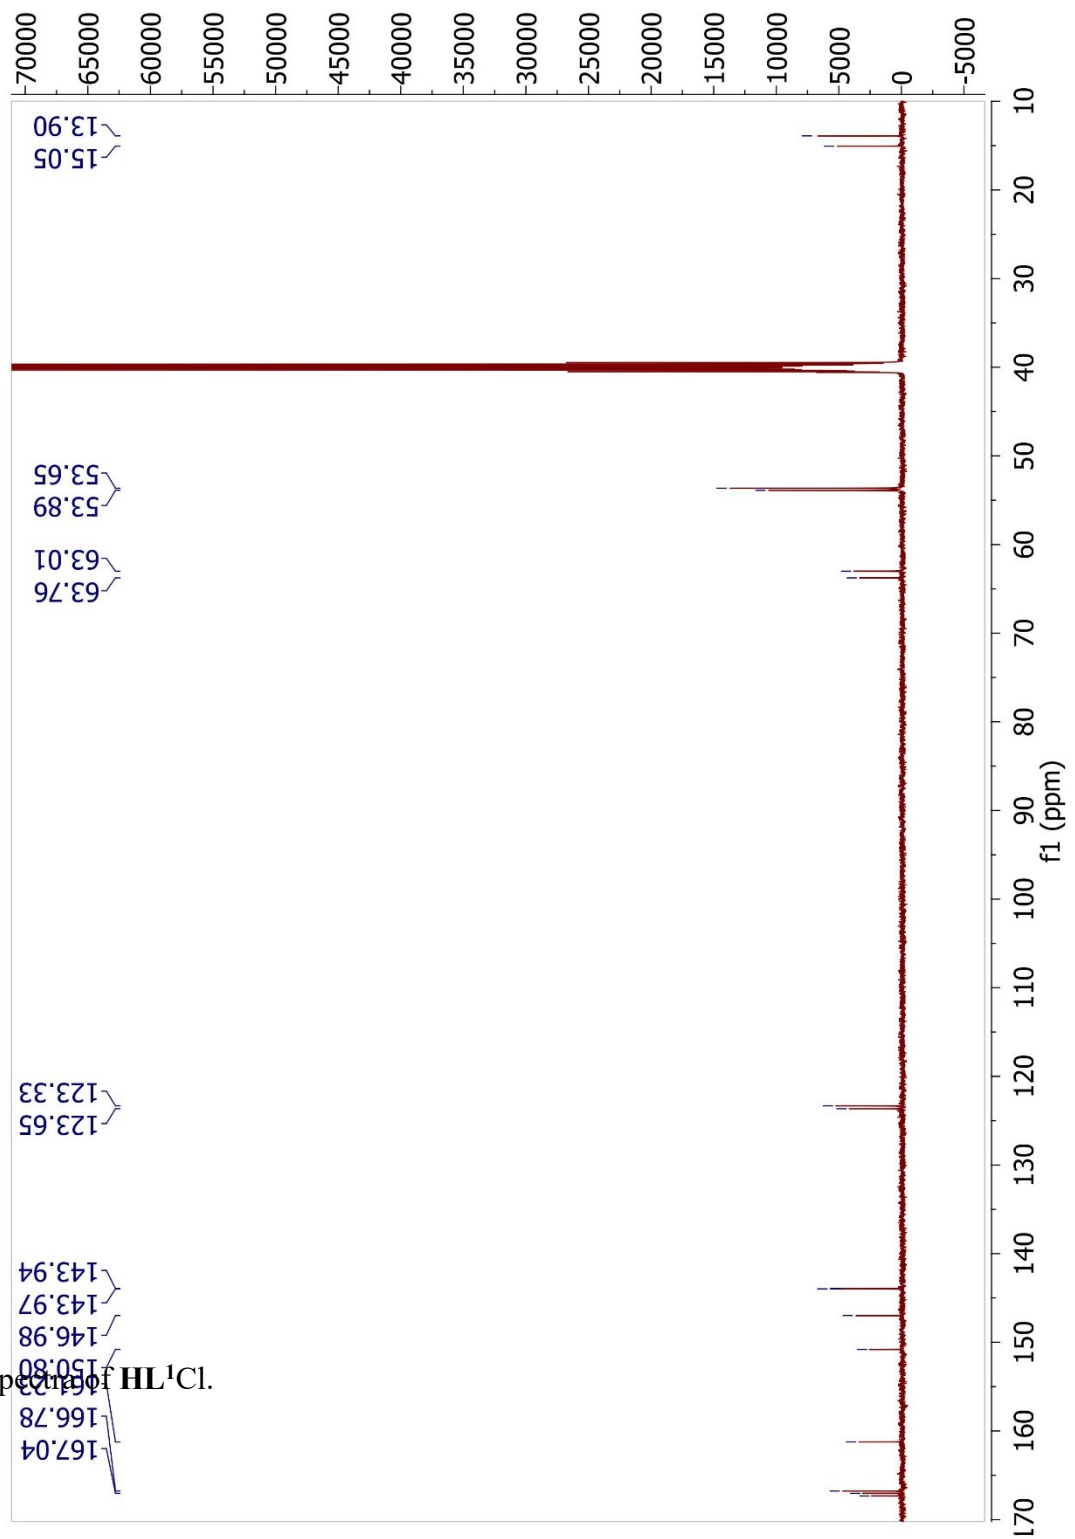

**Fig. S10**  $^{13}\text{C}$  NMR spectra of  $\text{HL}^1\text{Cl}$ .

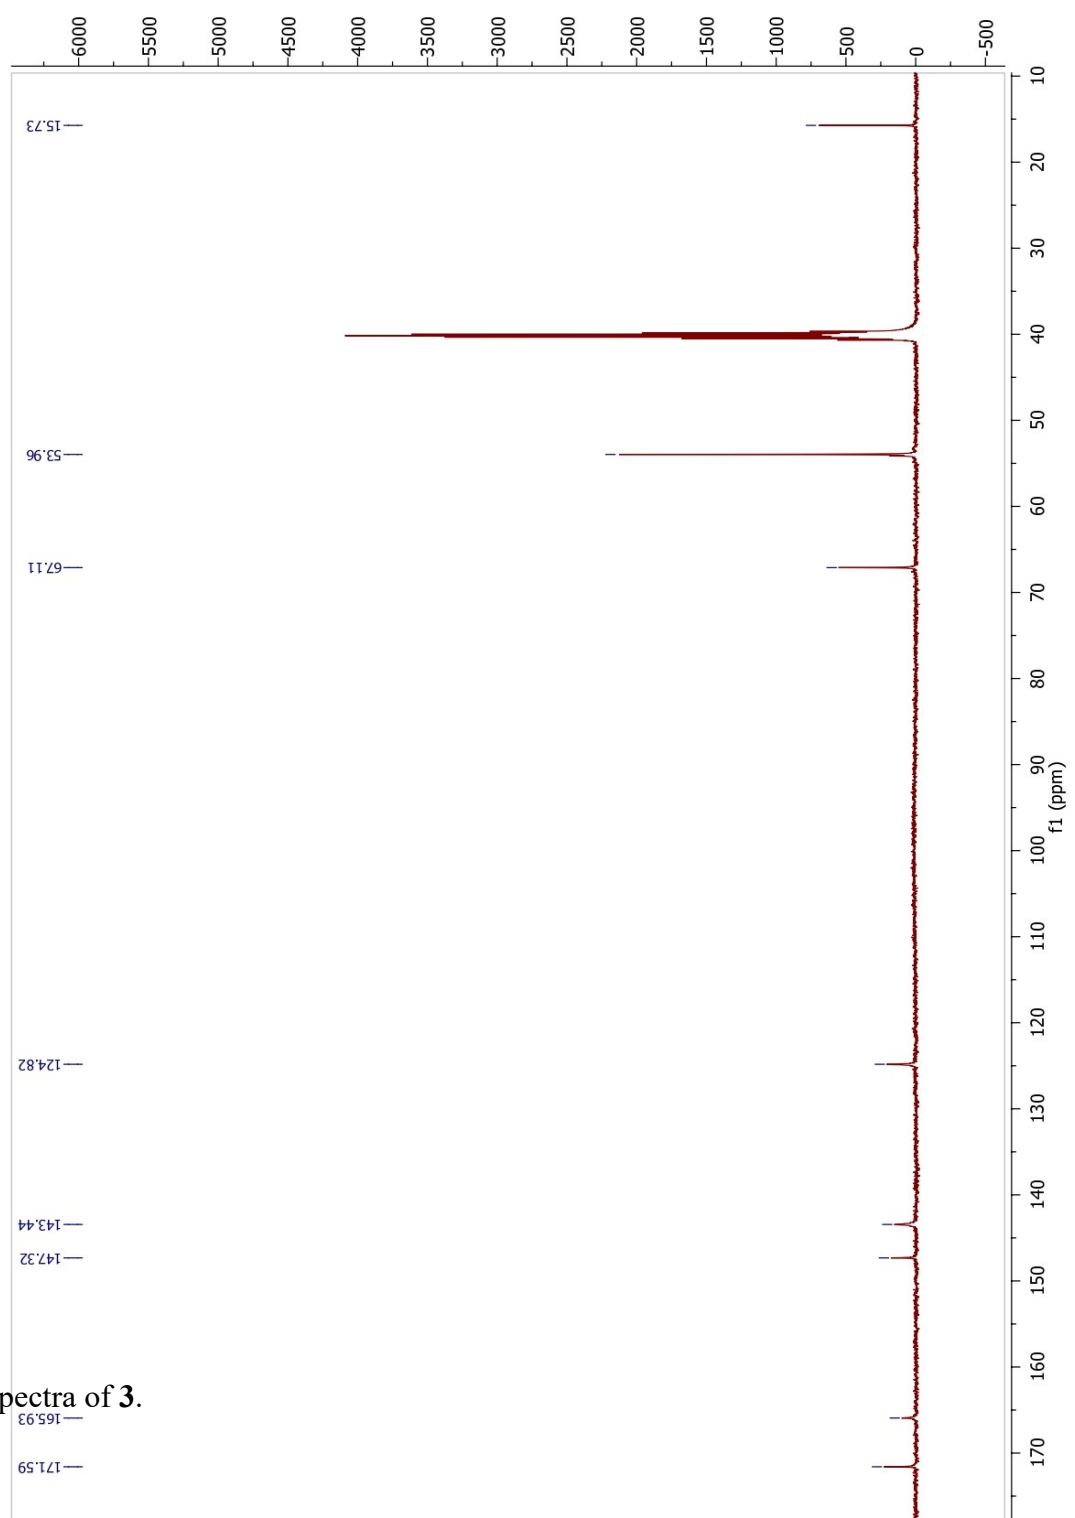

**Fig. S11**  $^{13}\text{C}$  NMR spectra of **3**.

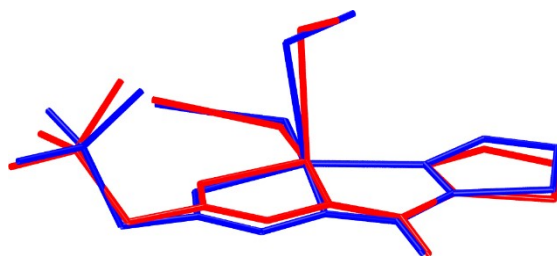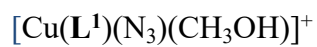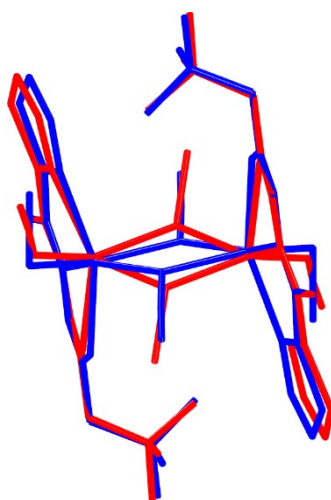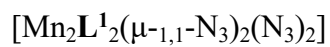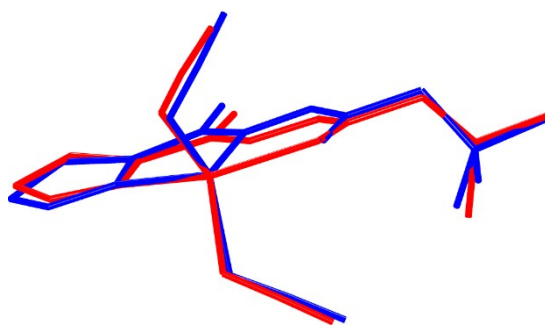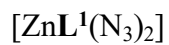

**Fig. S12** Overlay between X-ray determined (red) and DFT optimized (blue) structures of [Cu(L<sup>1</sup>)(N<sub>3</sub>)(CH<sub>3</sub>OH)]<sup>+</sup> (**1**), [Mn<sub>2</sub>L<sup>1</sup><sub>2</sub>(μ-<sub>1,1</sub>-N<sub>3</sub>)<sub>2</sub>(N<sub>3</sub>)<sub>2</sub>] (**2**) and [ZnL<sup>1</sup>(N<sub>3</sub>)<sub>2</sub>] (**3**)



## Cartesian coordinates of all optimized structures

All structures from Table 1 in the main text are optimized at ZORA-BP86-D3/TZP-COSMO(DMSO) level of theory.

84

[Cu<sub>2</sub>L<sub>12</sub>(N<sub>3</sub>)<sub>2</sub>(CH<sub>3</sub>OH)<sub>2</sub>]<sup>2+</sup>

|    |           |          |           |
|----|-----------|----------|-----------|
| Cu | 1.340973  | 5.287717 | 0.744678  |
| S  | 1.429499  | 0.908863 | 0.106665  |
| O  | 0.456415  | 6.712519 | 1.861486  |
| N  | 1.796774  | 3.447337 | 0.007823  |
| N  | 0.381857  | 4.184492 | 2.031421  |
| N  | -0.163673 | 4.825332 | 3.110273  |
| N  | 0.464635  | 7.966988 | 4.564390  |
| N  | 2.309108  | 6.384520 | -0.505436 |
| N  | 2.200227  | 7.587162 | -0.409324 |
| N  | 2.113996  | 8.752043 | -0.372254 |
| C  | 2.465791  | 2.936729 | -1.067906 |
| H  | 3.013616  | 3.604779 | -1.727790 |
| C  | 2.379927  | 1.569224 | -1.178246 |
| H  | 2.833172  | 0.918165 | -1.918895 |
| C  | 1.194296  | 2.499807 | 0.736031  |
| C  | 0.452628  | 2.882606 | 1.930328  |
| C  | -0.070001 | 1.909260 | 2.928930  |
| H  | -0.948559 | 2.321295 | 3.435759  |
| H  | 0.700231  | 1.706588 | 3.689148  |
| H  | -0.333621 | 0.960592 | 2.448151  |
| C  | -0.057958 | 6.138484 | 2.899174  |
| C  | -0.587873 | 7.010990 | 4.012484  |
| H  | -0.922765 | 6.383164 | 4.842394  |
| H  | -1.418495 | 7.633211 | 3.660065  |
| C  | 1.750184  | 7.227145 | 4.843116  |
| H  | 2.166410  | 6.859418 | 3.899127  |
| H  | 1.527140  | 6.394551 | 5.516566  |
| H  | 2.441766  | 7.925964 | 5.320565  |
| C  | 0.724927  | 9.101586 | 3.601417  |
| H  | 1.485993  | 9.748400 | 4.045250  |
| H  | -0.210122 | 9.653073 | 3.466300  |
| H  | 1.059626  | 8.678450 | 2.652027  |
| C  | -0.070363 | 8.536470 | 5.854626  |
| H  | 0.656494  | 9.259312 | 6.234585  |
| H  | -0.204891 | 7.718045 | 6.566518  |
| H  | -1.025317 | 9.027602 | 5.648450  |
| O  | 3.154454  | 5.424876 | 2.366515  |
| H  | 3.874266  | 5.718618 | 1.775076  |

|    |           |          |           |
|----|-----------|----------|-----------|
| C  | 3.569803  | 4.178091 | 2.976607  |
| H  | 4.514797  | 4.304324 | 3.520778  |
| H  | 3.679971  | 3.384250 | 2.224217  |
| H  | 2.781016  | 3.900777 | 3.683846  |
| Cu | -1.342415 | 5.606484 | -0.744940 |
| S  | -1.430583 | 9.985033 | -0.104833 |
| O  | -0.458659 | 4.182210 | -1.862936 |
| N  | -1.797900 | 7.446538 | -0.007033 |
| N  | -0.384005 | 6.710309 | -2.031730 |
| N  | 0.160790  | 6.069883 | -3.111216 |
| N  | -0.467113 | 2.928591 | -4.567715 |
| N  | -2.309695 | 4.509282 | 0.505516  |
| N  | -2.200305 | 3.306678 | 0.409626  |
| N  | -2.113470 | 2.141811 | 0.372872  |
| C  | -2.466122 | 7.956595 | 1.069465  |
| H  | -3.013120 | 7.288183 | 1.729672  |
| C  | -2.380832 | 9.324139 | 1.179955  |
| H  | -2.833856 | 9.974799 | 1.921099  |
| C  | -1.195963 | 8.394398 | -0.735215 |
| C  | -0.455179 | 8.012157 | -1.930249 |
| C  | 0.066055  | 8.986155 | -2.928917 |
| H  | 0.940508  | 8.572193 | -3.441169 |
| H  | -0.707318 | 9.193877 | -3.684607 |
| H  | 0.335500  | 9.932551 | -2.446858 |
| C  | 0.054743  | 4.756645 | -2.900898 |
| C  | 0.584744  | 3.884723 | -4.014699 |
| H  | 0.919588  | 4.513225 | -4.844102 |
| H  | 1.415539  | 3.262560 | -3.662610 |
| C  | -1.753226 | 3.667532 | -4.846346 |
| H  | -2.170371 | 4.033789 | -3.902205 |
| H  | -1.530633 | 4.501055 | -5.518804 |
| H  | -2.443888 | 2.968557 | -5.324900 |
| C  | -0.726830 | 1.792669 | -3.606138 |
| H  | -1.486998 | 1.145578 | -4.051098 |
| H  | 0.208703  | 1.241978 | -3.471113 |
| H  | -1.062461 | 2.214426 | -2.656473 |
| C  | 0.068707  | 2.360755 | -5.858304 |
| H  | -0.657380 | 1.637583 | -6.239105 |
| H  | 0.202644  | 3.179950 | -6.569425 |
| H  | 1.024058  | 1.870314 | -5.652326 |
| O  | -3.156779 | 5.469987 | -2.365412 |
| H  | -3.876114 | 5.176024 | -1.773496 |
| C  | -3.572624 | 6.717048 | -2.974658 |
| H  | -4.517414 | 6.590700 | -3.519166 |
| H  | -3.683447 | 7.510226 | -2.221675 |
| H  | -2.783840 | 6.995400 | -3.681492 |

**[CuL1(N3)(CH3OH)]+ – complex 1**

|    |           |          |           |
|----|-----------|----------|-----------|
| Cu | 1.214406  | 5.133193 | 1.028035  |
| S  | 1.710534  | 0.730379 | 0.800364  |
| O  | 0.305233  | 6.578359 | 2.111189  |
| N  | 1.655629  | 3.258274 | 0.339310  |
| N  | 0.427301  | 4.066209 | 2.461973  |
| N  | -0.130220 | 4.743798 | 3.510165  |
| N  | 0.585482  | 7.735205 | 4.948699  |
| N  | 1.867695  | 6.180475 | -0.451394 |
| N  | 1.751165  | 7.387466 | -0.430135 |
| N  | 1.671190  | 8.552516 | -0.468033 |
| C  | 2.323150  | 2.702662 | -0.716033 |
| H  | 2.696344  | 3.336946 | -1.516003 |
| C  | 2.448522  | 1.335520 | -0.639515 |
| H  | 2.925246  | 0.658998 | -1.341354 |
| C  | 1.264866  | 2.340852 | 1.234775  |
| C  | 0.570914  | 2.766372 | 2.441689  |
| C  | 0.122668  | 1.822119 | 3.502168  |
| H  | -0.184542 | 2.375218 | 4.394158  |
| H  | 0.931540  | 1.124004 | 3.759307  |
| H  | -0.727109 | 1.224727 | 3.140112  |
| C  | -0.108559 | 6.045162 | 3.215655  |
| C  | -0.575535 | 6.959426 | 4.322817  |
| H  | -1.029505 | 6.368322 | 5.122640  |
| H  | -1.286095 | 7.704261 | 3.949911  |
| C  | 1.728661  | 6.807549 | 5.278915  |
| H  | 2.158183  | 6.424390 | 4.346389  |
| H  | 1.345288  | 5.988137 | 5.893011  |
| H  | 2.474991  | 7.383530 | 5.832463  |
| C  | 1.070523  | 8.819200 | 4.016572  |
| H  | 1.910907  | 9.324619 | 4.500101  |
| H  | 0.247618  | 9.519682 | 3.849310  |
| H  | 1.373008  | 8.355136 | 3.075442  |
| C  | 0.077276  | 8.369449 | 6.218936  |
| H  | 0.882362  | 8.976114 | 6.641823  |
| H  | -0.207846 | 7.574375 | 6.912987  |
| H  | -0.785219 | 8.995053 | 5.974172  |
| O  | 3.115973  | 5.452703 | 2.473521  |
| H  | 3.707511  | 6.017119 | 1.938854  |
| C  | 3.855499  | 4.249042 | 2.806238  |
| H  | 4.752744  | 4.494928 | 3.388455  |
| H  | 4.138207  | 3.695033 | 1.900844  |
| H  | 3.187766  | 3.632293 | 3.416633  |

## [CuL1(N3)]+

|    |           |          |           |
|----|-----------|----------|-----------|
| Cu | 1.255229  | 5.066015 | 1.044533  |
| S  | 1.552745  | 0.666138 | 0.668523  |
| O  | 0.559268  | 6.516629 | 2.234664  |
| N  | 1.653852  | 3.206207 | 0.318879  |
| N  | 0.573386  | 4.002994 | 2.522821  |
| N  | 0.034468  | 4.674228 | 3.589034  |
| N  | 0.434758  | 7.924295 | 4.898232  |
| N  | 1.943549  | 6.123080 | -0.392625 |
| N  | 1.859164  | 7.333920 | -0.349904 |
| N  | 1.811148  | 8.499015 | -0.372721 |
| C  | 2.198629  | 2.658026 | -0.807079 |
| H  | 2.558392  | 3.302191 | -1.605368 |
| C  | 2.227364  | 1.283012 | -0.796045 |
| H  | 2.602013  | 0.608220 | -1.558959 |
| C  | 1.261082  | 2.278752 | 1.201977  |
| C  | 0.647996  | 2.699839 | 2.455418  |
| C  | 0.169311  | 1.743925 | 3.489348  |
| H  | -0.121257 | 2.280442 | 4.396507  |
| H  | 0.956883  | 1.014739 | 3.724798  |
| H  | -0.697939 | 1.184595 | 3.107790  |
| C  | 0.074484  | 5.974584 | 3.312366  |
| C  | -0.530722 | 6.869023 | 4.368737  |
| H  | -0.839451 | 6.257777 | 5.221001  |
| H  | -1.396998 | 7.407749 | 3.967723  |
| C  | 1.773640  | 7.304765 | 5.209152  |
| H  | 2.231815  | 6.972450 | 4.274252  |
| H  | 1.618051  | 6.460619 | 5.886449  |
| H  | 2.395998  | 8.067082 | 5.684202  |
| C  | 0.609017  | 9.045179 | 3.900715  |
| H  | 1.320101  | 9.760586 | 4.322158  |
| H  | -0.364999 | 9.518456 | 3.748392  |
| H  | 0.979370  | 8.618725 | 2.966075  |
| C  | -0.157825 | 8.486710 | 6.166366  |
| H  | 0.495815  | 9.288016 | 6.521186  |
| H  | -0.219100 | 7.685271 | 6.907327  |
| H  | -1.153078 | 8.878804 | 5.940337  |

52

## [CuL1(N3)(CH3OH)(DMSO)]+

|   |          |          |           |
|---|----------|----------|-----------|
| N | 1.497662 | 3.276923 | 0.413907  |
| C | 1.105320 | 2.367671 | 1.313583  |
| S | 1.205515 | 0.740129 | 0.733064  |
| C | 1.788708 | 1.332191 | -0.782615 |
| C | 1.876567 | 2.704360 | -0.768483 |
| C | 0.610865 | 2.799745 | 2.612405  |

|    |           |          |           |
|----|-----------|----------|-----------|
| N  | 0.521797  | 4.103261 | 2.673898  |
| N  | 0.128832  | 4.767445 | 3.801670  |
| C  | 0.128375  | 6.077614 | 3.536697  |
| C  | -0.198910 | 6.956602 | 4.723792  |
| N  | 1.021069  | 7.735113 | 5.216694  |
| C  | 1.372526  | 8.840268 | 4.251449  |
| Cu | 1.002173  | 5.168116 | 1.113704  |
| O  | -1.143122 | 4.822572 | 0.153976  |
| O  | 3.218238  | 5.626705 | 2.458392  |
| C  | 3.977168  | 6.678251 | 1.816983  |
| O  | 0.399305  | 6.638039 | 2.407315  |
| N  | 1.600424  | 6.239369 | -0.390006 |
| N  | 1.354102  | 7.422428 | -0.400032 |
| N  | 1.136233  | 8.571816 | -0.465566 |
| C  | 0.265261  | 1.848071 | 3.705813  |
| C  | 0.672230  | 8.342473 | 6.551632  |
| C  | 2.202548  | 6.811761 | 5.385427  |
| H  | 2.213500  | 3.332062 | -1.589348 |
| H  | 2.037199  | 0.644587 | -1.584738 |
| H  | -0.039205 | 2.397814 | 4.600513  |
| H  | 1.127613  | 1.208354 | 3.942090  |
| H  | -0.557488 | 1.189862 | 3.388866  |
| H  | -0.537158 | 6.337895 | 5.559229  |
| H  | -0.962455 | 7.699294 | 4.468848  |
| H  | 2.497502  | 6.418413 | 4.405486  |
| H  | 1.909023  | 5.995147 | 6.051057  |
| H  | 3.016608  | 7.391488 | 5.828928  |
| H  | 2.271351  | 9.339342 | 4.622926  |
| H  | 0.533639  | 9.540895 | 4.214445  |
| H  | 1.536934  | 8.396005 | 3.267260  |
| H  | 1.522665  | 8.943651 | 6.884146  |
| H  | 0.475936  | 7.533456 | 7.260190  |
| H  | -0.214555 | 8.970308 | 6.428758  |
| H  | 4.922466  | 6.865099 | 2.346218  |
| H  | 3.356845  | 7.580264 | 1.857256  |
| H  | 4.175758  | 6.438804 | 0.763579  |
| S  | -0.980388 | 4.718122 | -1.377966 |
| C  | -2.317784 | 3.613187 | -1.918215 |
| C  | -1.657997 | 6.263014 | -2.055653 |
| H  | -1.668290 | 6.186819 | -3.149723 |
| H  | -2.667875 | 6.414534 | -1.656056 |
| H  | -0.987746 | 7.069355 | -1.738500 |
| H  | -2.330147 | 3.595879 | -3.014967 |
| H  | -2.080331 | 2.617645 | -1.527566 |
| H  | -3.271077 | 3.974694 | -1.514023 |
| H  | 3.758796  | 4.815362 | 2.419643  |

46

[CuL1(N3)(DMSO)]+

|    |           |           |           |
|----|-----------|-----------|-----------|
| S  | 2.274925  | 1.209008  | -0.443017 |
| C  | 2.125144  | 2.925532  | -0.586287 |
| C  | 1.386052  | 3.439435  | 0.451829  |
| N  | 0.948347  | 2.497225  | 1.342529  |
| C  | 1.339901  | 1.259375  | 1.007821  |
| Cu | 0.027932  | 2.456325  | 3.167643  |
| C  | 0.988153  | 0.137368  | 1.866601  |
| C  | 1.435272  | -1.257855 | 1.604309  |
| N  | 0.274578  | 0.537084  | 2.886936  |
| N  | -0.134376 | -0.295791 | 3.890421  |
| C  | -0.807939 | 0.435056  | 4.782807  |
| O  | -1.071025 | 1.697661  | 4.702491  |
| N  | -0.413582 | 4.325773  | 3.366770  |
| N  | -0.583455 | 4.737261  | 4.493001  |
| N  | -0.752533 | 5.186254  | 5.559947  |
| C  | -1.254809 | -0.313558 | 6.016323  |
| N  | -0.513008 | 0.155600  | 7.268757  |
| C  | -0.996333 | 1.518008  | 7.705945  |
| C  | -0.796760 | -0.839413 | 8.365933  |
| C  | 0.971804  | 0.208318  | 7.010246  |
| O  | 1.873320  | 2.407730  | 4.581712  |
| S  | 3.144928  | 1.942470  | 3.833320  |
| C  | 4.327243  | 1.504495  | 5.135591  |
| C  | 3.952150  | 3.462078  | 3.256583  |
| H  | 1.136992  | 4.486333  | 0.606410  |
| H  | 2.579248  | 3.451101  | -1.420241 |
| H  | 1.112834  | -1.915027 | 2.416564  |
| H  | 2.531021  | -1.293042 | 1.517857  |
| H  | 1.016673  | -1.619550 | 0.653910  |
| H  | -1.039366 | -1.379257 | 5.900463  |
| H  | -2.322326 | -0.161370 | 6.208460  |
| H  | 1.175710  | 0.980831  | 6.259030  |
| H  | 1.294084  | -0.772871 | 6.649763  |
| H  | 1.466935  | 0.450397  | 7.954478  |
| H  | -0.432864 | 1.800748  | 8.599154  |
| H  | -2.063115 | 1.444145  | 7.934567  |
| H  | -0.828061 | 2.222961  | 6.888859  |
| H  | -0.314895 | -0.484709 | 9.280731  |
| H  | -0.389271 | -1.809400 | 8.069473  |
| H  | -1.879333 | -0.903109 | 8.504905  |
| H  | 4.918063  | 3.194793  | 2.811656  |
| H  | 3.292522  | 3.897001  | 2.498439  |
| H  | 4.074348  | 4.144606  | 4.105543  |

|   |          |          |          |
|---|----------|----------|----------|
| H | 5.299543 | 1.314087 | 4.665773 |
| H | 4.384553 | 2.331125 | 5.853460 |
| H | 3.956976 | 0.590461 | 5.611459 |

56

[CuL1(N3)(DMSO)2]+

|    |           |          |           |
|----|-----------|----------|-----------|
| C  | 2.134754  | 1.346149 | -0.664803 |
| C  | 2.044587  | 2.718270 | -0.675172 |
| N  | 1.554202  | 3.252862 | 0.481286  |
| C  | 1.258283  | 2.318464 | 1.390674  |
| S  | 1.581606  | 0.708318 | 0.844327  |
| Cu | 1.048041  | 5.097445 | 1.209914  |
| O  | 3.197226  | 5.307707 | 2.435255  |
| S  | 4.256096  | 5.577108 | 1.350611  |
| C  | 4.515947  | 7.379632 | 1.343315  |
| C  | 0.722515  | 2.714819 | 2.686252  |
| N  | 0.544822  | 4.007710 | 2.743604  |
| N  | 0.130294  | 4.659936 | 3.871138  |
| C  | 0.104453  | 5.969596 | 3.606961  |
| C  | -0.214789 | 6.850024 | 4.792206  |
| N  | 0.990171  | 7.701229 | 5.198952  |
| C  | 0.705992  | 8.274041 | 6.564248  |
| N  | 1.610338  | 6.229841 | -0.273032 |
| N  | 1.424447  | 7.422684 | -0.210248 |
| N  | 1.274305  | 8.584840 | -0.195215 |
| O  | 0.372182  | 6.538352 | 2.480770  |
| O  | -1.223442 | 4.705975 | 0.263394  |
| S  | -1.579800 | 5.882034 | -0.663719 |
| C  | -3.199959 | 5.472298 | -1.381678 |
| C  | 0.455824  | 1.745353 | 3.786027  |
| C  | 2.237269  | 6.852328 | 5.261630  |
| C  | 1.200806  | 8.835451 | 4.224972  |
| C  | -2.150568 | 7.223157 | 0.429594  |
| C  | 5.848646  | 5.132722 | 2.108628  |
| H  | 2.325413  | 3.372986 | -1.496361 |
| H  | 2.493783  | 0.684354 | -1.446652 |
| H  | 0.121266  | 2.276050 | 4.681562  |
| H  | 1.365830  | 1.173051 | 4.017799  |
| H  | -0.318314 | 1.026182 | 3.479990  |
| H  | -0.474430 | 6.232261 | 5.655964  |
| H  | -1.029970 | 7.546453 | 4.567584  |
| H  | 2.488141  | 6.496477 | 4.254356  |
| H  | 2.044663  | 6.007039 | 5.928254  |
| H  | 3.042549  | 7.474819 | 5.661310  |
| H  | 2.076974  | 9.400300 | 4.553825  |
| H  | 0.310922  | 9.470556 | 4.242670  |

|   |           |          |           |
|---|-----------|----------|-----------|
| H | 1.345807  | 8.409359 | 3.229752  |
| H | 1.538190  | 8.926887 | 6.840856  |
| H | 0.614981  | 7.448375 | 7.275038  |
| H | -0.226246 | 8.843613 | 6.515548  |
| H | -2.487996 | 8.060305 | -0.193430 |
| H | -2.961339 | 6.844389 | 1.064125  |
| H | -1.286645 | 7.513639 | 1.037519  |
| H | -3.553134 | 6.340909 | -1.951153 |
| H | -3.045277 | 4.619734 | -2.051819 |
| H | -3.895953 | 5.217022 | -0.573070 |
| H | 5.337305  | 7.611150 | 0.654305  |
| H | 3.587276  | 7.838773 | 0.989752  |
| H | 4.750122  | 7.708606 | 2.363091  |
| H | 6.652249  | 5.428030 | 1.422462  |
| H | 5.941625  | 5.643893 | 3.074604  |
| H | 5.845323  | 4.045237 | 2.239454  |

90

[Mn<sub>2</sub>L<sub>12</sub>(μ-1,1-N<sub>3</sub>)<sub>2</sub>(N<sub>3</sub>)<sub>2</sub>]<sub>2</sub>·2CH<sub>3</sub>OH – **complex 2**

|    |           |           |           |
|----|-----------|-----------|-----------|
| Mn | -1.025936 | 1.286561  | -0.663518 |
| S  | 1.236422  | 5.430007  | -0.567085 |
| N  | 0.345684  | 3.075121  | -1.148209 |
| N  | -1.506735 | 2.915333  | 0.753535  |
| N  | -2.459704 | 2.671364  | 1.712639  |
| N  | -3.918285 | -0.158506 | 3.109340  |
| N  | 0.421833  | 0.736672  | 1.063568  |
| N  | 1.127202  | 1.570798  | 1.587587  |
| N  | 1.780346  | 2.405575  | 2.079258  |
| N  | -1.878940 | 1.477851  | -2.577184 |
| N  | -1.163749 | 1.355199  | -3.540335 |
| N  | -0.469437 | 1.235624  | -4.482559 |
| O  | -2.891474 | 0.769807  | 0.409580  |
| C  | 1.267135  | 3.395989  | -2.110964 |
| H  | 1.448308  | 2.701981  | -2.926725 |
| C  | 1.861283  | 4.625357  | -1.961972 |
| H  | 2.612448  | 5.099120  | -2.586103 |
| C  | 0.200554  | 4.064515  | -0.265197 |
| C  | -0.781090 | 4.000141  | 0.809120  |
| C  | -0.896338 | 5.108663  | 1.804870  |
| H  | -1.727799 | 4.933512  | 2.492473  |
| H  | -1.059479 | 6.064960  | 1.286460  |
| H  | 0.035217  | 5.201965  | 2.381115  |
| C  | -3.106810 | 1.532640  | 1.411896  |
| C  | -4.191976 | 1.167309  | 2.404478  |
| H  | -5.158912 | 1.061258  | 1.899617  |
| H  | -4.264233 | 1.930180  | 3.184638  |



|    |           |           |           |
|----|-----------|-----------|-----------|
| C  | -2.498958 | -0.189083 | 3.618774  |
| H  | -2.344796 | 0.701732  | 4.236637  |
| H  | -1.812875 | -0.181794 | 2.765339  |
| H  | -2.367285 | -1.095486 | 4.214386  |
| C  | -4.862515 | -0.259626 | 4.280047  |
| H  | -4.709784 | -1.230460 | 4.759378  |
| H  | -5.887005 | -0.173529 | 3.908095  |
| H  | -4.637308 | 0.551463  | 4.977695  |
| C  | -4.159605 | -1.320745 | 2.179667  |
| H  | -3.492348 | -1.215930 | 1.321193  |
| H  | -5.204423 | -1.291602 | 1.858057  |
| H  | -3.961309 | -2.241773 | 2.734184  |
| Mn | 1.027912  | -1.284246 | 0.662197  |
| S  | -1.232998 | -5.428954 | 0.582672  |
| N  | -0.342128 | -3.071915 | 1.154517  |
| N  | 1.503728  | -2.915659 | -0.753478 |
| N  | 2.454688  | -2.674180 | -1.715172 |
| N  | 3.917131  | 0.150290  | -3.119645 |
| N  | -0.421185 | -0.734888 | -1.064293 |
| N  | -1.128387 | -1.569022 | -1.585800 |
| N  | -1.783052 | -2.403969 | -2.075193 |
| N  | 1.883528  | -1.471979 | 2.575108  |
| N  | 1.168188  | -1.345216 | 3.537652  |
| N  | 0.473296  | -1.221607 | 4.478928  |
| O  | 2.890971  | -0.770286 | -0.416921 |
| C  | -1.257096 | -3.392515 | 2.123524  |
| H  | -1.434045 | -2.697457 | 2.939373  |
| C  | -1.850450 | -4.622919 | 1.980078  |
| H  | -2.597293 | -5.096622 | 2.609411  |
| C  | -0.200767 | -4.062584 | 0.272344  |
| C  | 0.776466  | -3.999539 | -0.806115 |
| C  | 0.886862  | -5.108590 | -1.801825 |
| H  | 1.716186  | -4.934756 | -2.492334 |
| H  | 1.050563  | -6.064932 | -1.283677 |
| H  | -0.046801 | -5.200806 | -2.374808 |
| C  | 3.103741  | -1.535753 | -1.417822 |
| C  | 4.188184  | -1.174960 | -2.412894 |
| H  | 5.156309  | -1.071032 | -1.909867 |
| H  | 4.256810  | -1.939340 | -3.191915 |
| C  | 2.496592  | 0.184402  | -3.625502 |
| H  | 2.338101  | -0.706871 | -4.241629 |
| H  | 1.812765  | 0.180374  | -2.770267 |
| H  | 2.366064  | 1.090278  | -4.222148 |
| C  | 4.858674  | 0.245996  | -4.292985 |
| H  | 4.708032  | 1.216455  | -4.773743 |
| H  | 5.883815  | 0.157065  | -3.923526 |

|   |           |           |           |
|---|-----------|-----------|-----------|
| H | 4.628845  | -0.565618 | -4.988519 |
| C | 4.164807  | 1.313462  | -2.192850 |
| H | 3.499287  | 1.212627  | -1.332553 |
| H | 5.210296  | 1.281221  | -1.873749 |
| H | 3.968516  | 2.234130  | -2.748713 |
| O | -2.021970 | 2.973456  | 4.454408  |
| H | -2.187402 | 2.958990  | 3.464482  |
| C | -0.618759 | 2.703569  | 4.638300  |
| H | 0.010371  | 3.439565  | 4.115502  |
| H | -0.342507 | 1.698193  | 4.277373  |
| H | -0.408539 | 2.757435  | 5.713357  |
| O | 2.014310  | -2.978042 | -4.456105 |
| H | 2.179576  | -2.963310 | -3.466159 |
| C | 0.611666  | -2.705538 | -4.640321 |
| H | -0.018875 | -3.439750 | -4.116715 |
| H | 0.337528  | -1.699198 | -4.280416 |
| H | 0.401291  | -2.760130 | -5.715311 |

78

[Mn<sub>2</sub>L<sub>12</sub>(μ-1,1-N<sub>3</sub>)<sub>2</sub>(N<sub>3</sub>)<sub>2</sub>]

|    |           |           |           |
|----|-----------|-----------|-----------|
| Mn | -1.074979 | 1.242792  | -0.686482 |
| S  | 1.251578  | 5.351129  | -0.542007 |
| N  | 0.340218  | 3.009756  | -1.148714 |
| N  | -1.613850 | 2.905556  | 0.645660  |
| N  | -2.610440 | 2.711512  | 1.567077  |
| N  | -3.896271 | -0.047049 | 3.152309  |
| N  | 0.214090  | 0.655488  | 1.184018  |
| N  | 0.725502  | 1.495155  | 1.891060  |
| N  | 1.188556  | 2.335760  | 2.558840  |
| N  | -1.944479 | 1.451190  | -2.596355 |
| N  | -1.222496 | 1.449709  | -3.561646 |
| N  | -0.522386 | 1.448056  | -4.507647 |
| O  | -2.930847 | 0.702474  | 0.381053  |
| C  | 1.305831  | 3.307800  | -2.073717 |
| H  | 1.505508  | 2.603663  | -2.876258 |
| C  | 1.916895  | 4.526829  | -1.908042 |
| H  | 2.702752  | 4.982077  | -2.502513 |
| C  | 0.176689  | 4.007057  | -0.276517 |
| C  | -0.857273 | 3.968167  | 0.743803  |
| C  | -1.013697 | 5.054825  | 1.757121  |
| H  | -1.436302 | 4.640273  | 2.678566  |
| H  | -1.703086 | 5.828342  | 1.384756  |
| H  | -0.050707 | 5.532481  | 1.976011  |
| C  | -3.203053 | 1.535243  | 1.319971  |
| C  | -4.273345 | 1.189394  | 2.333494  |
| H  | -5.232595 | 0.964453  | 1.854506  |

|    |           |           |           |
|----|-----------|-----------|-----------|
| H  | -4.387436 | 2.016217  | 3.039902  |
| C  | -2.450145 | 0.027168  | 3.577512  |
| H  | -2.292586 | 0.973326  | 4.102740  |
| H  | -1.810518 | -0.019441 | 2.689311  |
| H  | -2.243671 | -0.812611 | 4.246342  |
| C  | -4.773676 | -0.084006 | 4.376958  |
| H  | -4.547391 | -0.998302 | 4.932361  |
| H  | -5.818810 | -0.081272 | 4.055436  |
| H  | -4.557108 | 0.797466  | 4.986105  |
| C  | -4.130399 | -1.297013 | 2.342754  |
| H  | -3.510235 | -1.241841 | 1.445078  |
| H  | -5.189826 | -1.336938 | 2.074803  |
| H  | -3.868712 | -2.156851 | 2.964380  |
| Mn | 1.074979  | -1.242792 | 0.686482  |
| S  | -1.251578 | -5.351129 | 0.542007  |
| N  | -0.340218 | -3.009756 | 1.148714  |
| N  | 1.613850  | -2.905556 | -0.645660 |
| N  | 2.610440  | -2.711512 | -1.567077 |
| N  | 3.896271  | 0.047049  | -3.152309 |
| N  | -0.214090 | -0.655488 | -1.184018 |
| N  | -0.725502 | -1.495155 | -1.891060 |
| N  | -1.188556 | -2.335760 | -2.558840 |
| N  | 1.944479  | -1.451190 | 2.596355  |
| N  | 1.222496  | -1.449709 | 3.561646  |
| N  | 0.522386  | -1.448056 | 4.507647  |
| O  | 2.930847  | -0.702474 | -0.381053 |
| C  | -1.305831 | -3.307800 | 2.073717  |
| H  | -1.505508 | -2.603663 | 2.876258  |
| C  | -1.916895 | -4.526829 | 1.908042  |
| H  | -2.702752 | -4.982077 | 2.502513  |
| C  | -0.176689 | -4.007057 | 0.276517  |
| C  | 0.857273  | -3.968167 | -0.743803 |
| C  | 1.013697  | -5.054825 | -1.757121 |
| H  | 1.436302  | -4.640273 | -2.678566 |
| H  | 1.703086  | -5.828342 | -1.384756 |
| H  | 0.050707  | -5.532481 | -1.976011 |
| C  | 3.203053  | -1.535243 | -1.319971 |
| C  | 4.273345  | -1.189394 | -2.333494 |
| H  | 5.232595  | -0.964453 | -1.854506 |
| H  | 4.387436  | -2.016217 | -3.039902 |
| C  | 2.450145  | -0.027168 | -3.577512 |
| H  | 2.292586  | -0.973326 | -4.102740 |
| H  | 1.810518  | 0.019441  | -2.689311 |
| H  | 2.243671  | 0.812611  | -4.246342 |
| C  | 4.773676  | 0.084006  | -4.376958 |
| H  | 4.547391  | 0.998302  | -4.932361 |

|   |          |           |           |
|---|----------|-----------|-----------|
| H | 5.818810 | 0.081272  | -4.055436 |
| H | 4.557108 | -0.797466 | -4.986105 |
| C | 4.130399 | 1.297013  | -2.342754 |
| H | 3.510235 | 1.241841  | -1.445078 |
| H | 5.189826 | 1.336938  | -2.074803 |
| H | 3.868712 | 2.156851  | -2.964380 |

39

[MnL1(N3)2]

|    |           |           |           |
|----|-----------|-----------|-----------|
| Mn | -1.258778 | 1.403430  | -1.104717 |
| S  | 1.476073  | 5.157783  | -0.549115 |
| N  | 0.337854  | 2.994378  | -1.381905 |
| N  | -1.408093 | 2.700598  | 0.594185  |
| N  | -2.326639 | 2.438956  | 1.582139  |
| N  | -3.941314 | -0.354599 | 2.827409  |
| N  | -0.183773 | -0.301065 | -0.848391 |
| N  | -0.474255 | -1.192349 | -0.088086 |
| N  | -0.730209 | -2.070629 | 0.645699  |
| N  | -2.163669 | 1.566830  | -2.906785 |
| N  | -1.771819 | 2.100354  | -3.914902 |
| N  | -1.424997 | 2.610436  | -4.912136 |
| O  | -2.983148 | 0.727832  | 0.111964  |
| C  | 1.249668  | 3.348580  | -2.342054 |
| H  | 1.362886  | 2.734491  | -3.232763 |
| C  | 1.962339  | 4.491085  | -2.067049 |
| H  | 2.734912  | 4.968172  | -2.661865 |
| C  | 0.334647  | 3.858866  | -0.361626 |
| C  | -0.576195 | 3.702767  | 0.756885  |
| C  | -0.560858 | 4.606073  | 1.945570  |
| H  | -0.600112 | 4.009667  | 2.865736  |
| H  | -1.448879 | 5.254731  | 1.940655  |
| H  | 0.334894  | 5.237042  | 1.959227  |
| C  | -3.080161 | 1.397164  | 1.203225  |
| C  | -4.150022 | 1.026668  | 2.209244  |
| H  | -5.138832 | 1.008449  | 1.736722  |
| H  | -4.140945 | 1.743892  | 3.035092  |
| C  | -2.525232 | -0.499448 | 3.323503  |
| H  | -2.290914 | 0.354467  | 3.964649  |
| H  | -1.853419 | -0.538403 | 2.461449  |
| H  | -2.460198 | -1.433716 | 3.887492  |
| C  | -4.891922 | -0.481256 | 3.990083  |
| H  | -4.787143 | -1.485403 | 4.409533  |
| H  | -5.910176 | -0.324159 | 3.624028  |
| H  | -4.632566 | 0.274440  | 4.736577  |
| C  | -4.238304 | -1.445327 | 1.827921  |
| H  | -3.565495 | -1.321504 | 0.976738  |

|   |           |           |          |
|---|-----------|-----------|----------|
| H | -5.281102 | -1.345579 | 1.514105 |
| H | -4.077727 | -2.406769 | 2.323752 |

49

cis-[MnL1(N3)2(DMSO)]

|    |           |           |           |
|----|-----------|-----------|-----------|
| N  | 1.287430  | 6.402908  | 4.624859  |
| C  | 2.032684  | 7.406786  | 4.151146  |
| S  | 3.068966  | 6.935455  | 2.828580  |
| C  | 2.457816  | 5.319203  | 2.947944  |
| C  | 1.527839  | 5.229913  | 3.954382  |
| C  | 1.973230  | 8.741404  | 4.720307  |
| N  | 1.006215  | 8.877390  | 5.595607  |
| N  | 0.914707  | 10.060847 | 6.287277  |
| C  | -0.005154 | 9.931231  | 7.254296  |
| O  | -0.719286 | 8.898161  | 7.526659  |
| Mn | 0.006116  | 7.128058  | 6.426476  |
| O  | -1.655593 | 7.550589  | 4.903663  |
| S  | -1.834534 | 6.385205  | 3.895730  |
| C  | -3.600847 | 6.387575  | 3.486293  |
| N  | -1.023697 | 5.401840  | 6.959938  |
| N  | -0.823324 | 4.309183  | 6.497150  |
| N  | -0.642975 | 3.233547  | 6.055086  |
| N  | 1.653170  | 6.898245  | 7.748063  |
| N  | 2.764740  | 7.115590  | 7.334136  |
| N  | 3.843133  | 7.335476  | 6.921220  |
| C  | 2.944640  | 9.816835  | 4.351640  |
| C  | -0.107699 | 11.149689 | 8.147278  |
| N  | 0.429837  | 10.864226 | 9.554339  |
| C  | 0.641686  | 12.185465 | 10.246538 |
| C  | -0.564435 | 10.047919 | 10.343009 |
| C  | 1.740766  | 10.121709 | 9.479862  |
| C  | -1.216286 | 7.024463  | 2.311821  |
| H  | 0.992906  | 4.327908  | 4.247173  |
| H  | 2.818095  | 4.539261  | 2.284327  |
| H  | 3.323605  | 10.295015 | 5.263378  |
| H  | 2.448281  | 10.596204 | 3.754787  |
| H  | 3.787850  | 9.418486  | 3.775813  |
| H  | -1.144966 | 11.477764 | 8.275081  |
| H  | 0.500417  | 11.960573 | 7.736979  |
| H  | 2.428394  | 10.692771 | 8.850077  |
| H  | 1.562065  | 9.130085  | 9.049129  |
| H  | 2.132606  | 10.032501 | 10.496551 |
| H  | 0.966432  | 11.988069 | 11.271933 |
| H  | -0.304661 | 12.733394 | 10.245706 |
| H  | 1.408175  | 12.744748 | 9.703124  |
| H  | -0.755732 | 9.124248  | 9.792169  |

|   |           |           |           |
|---|-----------|-----------|-----------|
| H | -1.483471 | 10.632615 | 10.441324 |
| H | -0.131845 | 9.846816  | 11.326883 |
| H | -4.133997 | 6.068664  | 4.388051  |
| H | -3.896856 | 7.401246  | 3.190747  |
| H | -3.765938 | 5.670021  | 2.673505  |
| H | -1.432016 | 6.283469  | 1.532847  |
| H | -1.702591 | 7.983497  | 2.099019  |
| H | -0.134974 | 7.151502  | 2.425372  |

49

trans-[MnL1(N3)2(DMSO)]

|    |           |          |          |
|----|-----------|----------|----------|
| Mn | 0.400532  | 3.976741 | 4.149176 |
| S  | 2.801187  | 8.033488 | 4.057287 |
| N  | 1.888639  | 5.658337 | 3.607371 |
| N  | -0.219526 | 5.776754 | 5.259232 |
| N  | -1.218940 | 5.648951 | 6.193310 |
| N  | -2.320352 | 3.056021 | 8.097278 |
| N  | 1.620964  | 3.446419 | 5.815243 |
| N  | 2.153385  | 4.300937 | 6.477150 |
| N  | 2.662425  | 5.141444 | 7.123659 |
| N  | -0.655257 | 4.412620 | 2.309031 |
| N  | -0.103788 | 4.776664 | 1.303803 |
| N  | 0.427977  | 5.129022 | 0.313252 |
| O  | -1.491879 | 3.519212 | 5.216630 |
| C  | 2.986124  | 5.814003 | 2.801850 |
| H  | 3.295630  | 4.999778 | 2.150261 |
| C  | 3.614692  | 7.031262 | 2.905137 |
| H  | 4.493261  | 7.388782 | 2.377310 |
| C  | 1.654093  | 6.750006 | 4.337449 |
| C  | 0.560297  | 6.827176 | 5.294591 |
| C  | 0.426330  | 7.993934 | 6.220476 |
| H  | -0.482514 | 7.890447 | 6.819938 |
| H  | 0.385310  | 8.934091 | 5.650930 |
| H  | 1.295492  | 8.048049 | 6.891540 |
| C  | -1.780173 | 4.436895 | 6.064753 |
| C  | -2.813095 | 4.140364 | 7.132411 |
| H  | -3.749722 | 3.768036 | 6.702555 |
| H  | -2.997544 | 5.035057 | 7.733899 |
| C  | -0.901221 | 3.337566 | 8.524532 |
| H  | -0.852953 | 4.356093 | 8.919291 |
| H  | -0.243942 | 3.233723 | 7.654086 |
| H  | -0.634027 | 2.610952 | 9.296499 |
| C  | -3.218133 | 3.066976 | 9.306530 |
| H  | -2.910789 | 2.253439 | 9.969544 |
| H  | -4.249137 | 2.918643 | 8.973981 |
| H  | -3.112843 | 4.031954 | 9.809924 |

|   |           |           |          |
|---|-----------|-----------|----------|
| C | -2.386264 | 1.696457  | 7.445844 |
| H | -1.798107 | 1.736790  | 6.526165 |
| H | -3.434238 | 1.476814  | 7.221803 |
| H | -1.984772 | 0.964492  | 8.152307 |
| O | 0.834971  | 2.012499  | 3.341240 |
| S | 0.031333  | 1.540823  | 2.085042 |
| C | 0.536571  | -0.189929 | 1.894138 |
| H | 0.402767  | -0.712145 | 2.848745 |
| H | -0.081934 | -0.635428 | 1.105441 |
| H | 1.588510  | -0.183430 | 1.590466 |
| C | -1.652434 | 1.236974  | 2.689956 |
| H | -2.232418 | 0.792844  | 1.872041 |
| H | -1.601616 | 0.566560  | 3.555497 |
| H | -2.058006 | 2.213950  | 2.970378 |

39

[ZnL1(N3)2] – **complex 3**

|    |          |           |           |
|----|----------|-----------|-----------|
| Zn | 3.741506 | 8.256832  | 0.356708  |
| S  | 8.048698 | 7.941011  | -1.188711 |
| N  | 5.866460 | 7.692764  | 0.159386  |
| N  | 4.334898 | 9.319522  | -1.309893 |
| N  | 3.479792 | 10.149897 | -1.972780 |
| N  | 0.861481 | 12.218160 | -1.243570 |
| N  | 3.761322 | 9.180766  | 2.124257  |
| N  | 3.259279 | 10.275973 | 2.216096  |
| N  | 2.787501 | 11.339072 | 2.349276  |
| N  | 2.886144 | 6.467416  | 0.280889  |
| N  | 1.986713 | 6.256700  | -0.499205 |
| N  | 1.113240 | 5.996837  | -1.232106 |
| O  | 1.901115 | 9.418501  | -0.383668 |
| C  | 6.786090 | 6.878967  | 0.763711  |
| H  | 6.503749 | 6.299633  | 1.639790  |
| C  | 8.027987 | 6.880754  | 0.174670  |
| H  | 8.917418 | 6.330174  | 0.464185  |
| C  | 6.379898 | 8.328054  | -0.895298 |
| C  | 5.581860 | 9.239070  | -1.700418 |
| C  | 6.145341 | 10.010297 | -2.847615 |
| H  | 6.035784 | 11.087663 | -2.659852 |
| H  | 5.585668 | 9.784253  | -3.765517 |
| H  | 7.204863 | 9.782401  | -3.007679 |
| C  | 2.260080 | 10.103689 | -1.392588 |
| C  | 1.253619 | 11.005104 | -2.085125 |
| H  | 1.683120 | 11.395283 | -3.012555 |
| H  | 0.325651 | 10.461932 | -2.295631 |
| C  | 0.008217 | 11.805872 | -0.070299 |

|   |           |           |           |
|---|-----------|-----------|-----------|
| H | -0.897956 | 11.330322 | -0.456323 |
| H | -0.244331 | 12.708072 | 0.493873  |
| H | 0.581621  | 11.104494 | 0.540230  |
| C | 2.091800  | 12.930933 | -0.742695 |
| H | 2.586431  | 12.297196 | -0.000710 |
| H | 1.771685  | 13.868164 | -0.279353 |
| H | 2.751856  | 13.126123 | -1.592093 |
| C | 0.071363  | 13.150290 | -2.126282 |
| H | 0.716881  | 13.488974 | -2.941295 |
| H | -0.257439 | 13.999276 | -1.520732 |
| H | -0.791063 | 12.606580 | -2.521490 |

78

[Zn<sub>2</sub>L<sub>12</sub>(μ-1,1-N<sub>3</sub>)<sub>2</sub>(N<sub>3</sub>)<sub>2</sub>]

|    |           |           |           |
|----|-----------|-----------|-----------|
| Zn | -1.088865 | 1.236139  | -0.752088 |
| S  | 1.285661  | 5.230126  | -0.352080 |
| N  | 0.463508  | 2.885638  | -1.057284 |
| N  | -1.632365 | 2.734108  | 0.578703  |
| N  | -2.698503 | 2.524007  | 1.404214  |
| N  | -4.082792 | -0.150221 | 2.965999  |
| N  | 0.161787  | 0.482987  | 1.297253  |
| N  | 0.701085  | 1.343376  | 1.953255  |
| N  | 1.163539  | 2.216155  | 2.577094  |
| N  | -1.981840 | 1.697928  | -2.581609 |
| N  | -1.228657 | 1.713587  | -3.522582 |
| N  | -0.506325 | 1.732327  | -4.449589 |
| O  | -2.900690 | 0.492514  | 0.221939  |
| C  | 1.487706  | 3.211642  | -1.903371 |
| H  | 1.759535  | 2.524077  | -2.696982 |
| C  | 2.064624  | 4.437989  | -1.676388 |
| H  | 2.885518  | 4.913528  | -2.204028 |
| C  | 0.219804  | 3.863785  | -0.186758 |
| C  | -0.886919 | 3.792538  | 0.752343  |
| C  | -1.139968 | 4.845810  | 1.780611  |
| H  | -1.378315 | 4.374729  | 2.741655  |
| H  | -2.005852 | 5.458695  | 1.490002  |
| H  | -0.271979 | 5.503673  | 1.903303  |
| C  | -3.261215 | 1.337814  | 1.111931  |
| C  | -4.421236 | 1.008602  | 2.027032  |
| H  | -5.310318 | 0.705051  | 1.464247  |
| H  | -4.646457 | 1.872279  | 2.658946  |
| C  | -2.715548 | 0.051519  | 3.571546  |
| H  | -2.690852 | 1.035628  | 4.047543  |
| H  | -1.959139 | -0.002347 | 2.779415  |
| H  | -2.558922 | -0.731814 | 4.318033  |
| C  | -5.114414 | -0.179460 | 4.064202  |



|    |           |           |           |
|----|-----------|-----------|-----------|
| H  | -4.906829 | -1.039105 | 4.707291  |
| H  | -6.103269 | -0.274465 | 3.607330  |
| H  | -5.042972 | 0.751085  | 4.633583  |
| C  | -4.126526 | -1.454711 | 2.213216  |
| H  | -3.398620 | -1.402612 | 1.400030  |
| H  | -5.136555 | -1.585061 | 1.815363  |
| H  | -3.891163 | -2.259028 | 2.914231  |
| Zn | 1.146699  | -1.203680 | 0.708800  |
| S  | -1.256973 | -5.190246 | 0.886759  |
| N  | -0.337443 | -2.818986 | 1.330040  |
| N  | 1.487901  | -2.774388 | -0.606198 |
| N  | 2.431251  | -2.628892 | -1.580597 |
| N  | 3.897627  | -0.015272 | -3.309705 |
| N  | -0.153499 | -0.472524 | -1.326760 |
| N  | -0.745363 | -1.315846 | -1.959076 |
| N  | -1.262851 | -2.172065 | -2.562350 |
| N  | 2.278962  | -1.488737 | 2.429217  |
| N  | 1.646791  | -1.473824 | 3.456141  |
| N  | 1.043376  | -1.461851 | 4.463963  |
| O  | 2.883349  | -0.577529 | -0.507600 |
| C  | -1.181005 | -3.110005 | 2.367079  |
| H  | -1.306250 | -2.388017 | 3.168400  |
| C  | -1.780551 | -4.345155 | 2.299588  |
| H  | -2.485376 | -4.800467 | 2.988238  |
| C  | -0.247364 | -3.833528 | 0.471765  |
| C  | 0.698768  | -3.815570 | -0.632043 |
| C  | 0.774376  | -4.910716 | -1.645542 |
| H  | 0.934732  | -4.480449 | -2.640684 |
| H  | 1.626384  | -5.572007 | -1.427742 |
| H  | -0.141225 | -5.512880 | -1.651717 |
| C  | 3.083876  | -1.465522 | -1.404502 |
| C  | 4.156069  | -1.253700 | -2.455836 |
| H  | 5.144972  | -1.119945 | -2.002344 |
| H  | 4.167522  | -2.111901 | -3.133473 |
| C  | 2.446783  | 0.037538  | -3.722760 |
| H  | 2.206390  | -0.890099 | -4.249881 |
| H  | 1.818641  | 0.130710  | -2.829451 |
| H  | 2.309362  | 0.893761  | -4.388644 |
| C  | 4.763347  | -0.106175 | -4.540075 |
| H  | 4.628142  | 0.809200  | -5.123001 |
| H  | 5.805164  | -0.206810 | -4.223940 |
| H  | 4.452724  | -0.979266 | -5.119643 |
| C  | 4.266739  | 1.228079  | -2.541317 |
| H  | 3.667215  | 1.253101  | -1.628644 |
| H  | 5.331396  | 1.172885  | -2.298055 |
| H  | 4.073288  | 2.092335  | -3.182391 |

## cis-[ZnL1(N3)2(DMSO)]

|    |           |           |           |
|----|-----------|-----------|-----------|
| N  | 1.277058  | 6.387383  | 4.621534  |
| C  | 2.002522  | 7.396377  | 4.140500  |
| S  | 3.027825  | 6.938518  | 2.807119  |
| C  | 2.440986  | 5.316342  | 2.934242  |
| C  | 1.524656  | 5.216241  | 3.953265  |
| C  | 1.939085  | 8.738617  | 4.703443  |
| N  | 1.032234  | 8.861152  | 5.633811  |
| N  | 0.923743  | 10.030394 | 6.330647  |
| C  | -0.023018 | 9.892480  | 7.279306  |
| O  | -0.774941 | 8.880530  | 7.500118  |
| Zn | -0.001128 | 7.206892  | 6.347350  |
| O  | -1.531027 | 7.660189  | 4.693729  |
| S  | -1.771439 | 6.385786  | 3.849661  |
| C  | -3.560192 | 6.352006  | 3.547552  |
| N  | -1.163347 | 5.652144  | 6.898274  |
| N  | -0.746581 | 4.539143  | 6.694767  |
| N  | -0.376883 | 3.441589  | 6.506560  |
| N  | 1.588926  | 6.852145  | 7.776350  |
| N  | 2.701296  | 7.045927  | 7.358873  |
| N  | 3.786889  | 7.244058  | 6.949877  |
| C  | 2.847362  | 9.839973  | 4.260429  |
| C  | -0.103814 | 11.086890 | 8.207068  |
| N  | 0.438464  | 10.751322 | 9.600380  |
| C  | 0.658521  | 12.047816 | 10.335832 |
| C  | -0.555065 | 9.911825  | 10.365257 |
| C  | 1.746581  | 10.006357 | 9.495997  |
| C  | -1.245135 | 6.823039  | 2.167175  |
| H  | 1.003733  | 4.309396  | 4.252674  |
| H  | 2.799921  | 4.541343  | 2.264203  |
| H  | 3.228329  | 10.373511 | 5.139843  |
| H  | 2.296363  | 10.568511 | 3.647443  |
| H  | 3.690100  | 9.457527  | 3.673454  |
| H  | -1.135456 | 11.425467 | 8.350005  |
| H  | 0.514132  | 11.900193 | 7.816336  |
| H  | 2.432219  | 10.593206 | 8.878631  |
| H  | 1.561565  | 9.027064  | 9.038772  |
| H  | 2.144166  | 9.887366  | 10.507456 |
| H  | 0.988388  | 11.814354 | 11.352005 |
| H  | -0.285702 | 12.598810 | 10.358781 |
| H  | 1.424280  | 12.622327 | 9.807522  |
| H  | -0.748724 | 9.005228  | 9.787529  |
| H  | -1.473388 | 10.493906 | 10.483842 |
| H  | -0.120055 | 9.680166  | 11.341281 |
| H  | -4.035245 | 6.152559  | 4.514108  |

|   |           |          |          |
|---|-----------|----------|----------|
| H | -3.874921 | 7.323272 | 3.147440 |
| H | -3.777795 | 5.540449 | 2.842788 |
| H | -1.512115 | 5.997299 | 1.496583 |
| H | -1.734938 | 7.756523 | 1.867020 |
| H | -0.157158 | 6.945302 | 2.200177 |

49

trans-[ZnL1(N3)2(DMSO)]

|    |           |          |           |
|----|-----------|----------|-----------|
| Zn | 0.379225  | 3.972412 | 4.196413  |
| S  | 2.793078  | 7.914260 | 3.918201  |
| N  | 1.916165  | 5.507149 | 3.619981  |
| N  | -0.202771 | 5.702512 | 5.250570  |
| N  | -1.230820 | 5.602550 | 6.142222  |
| N  | -2.323585 | 3.110279 | 8.150473  |
| N  | 1.556540  | 3.347278 | 5.883794  |
| N  | 2.074098  | 4.222530 | 6.527402  |
| N  | 2.573548  | 5.076361 | 7.164639  |
| N  | -0.759613 | 4.444314 | 2.430860  |
| N  | -0.209986 | 4.901077 | 1.463580  |
| N  | 0.308930  | 5.339936 | 0.502717  |
| O  | -1.477659 | 3.428116 | 5.246004  |
| C  | 3.014621  | 5.620794 | 2.811793  |
| H  | 3.335768  | 4.769562 | 2.216070  |
| C  | 3.627520  | 6.850174 | 2.839505  |
| H  | 4.503858  | 7.185771 | 2.294007  |
| C  | 1.660686  | 6.639149 | 4.274716  |
| C  | 0.546679  | 6.769408 | 5.207670  |
| C  | 0.350815  | 8.011198 | 6.017290  |
| H  | -0.470051 | 7.864448 | 6.725031  |
| H  | 0.115107  | 8.864098 | 5.362985  |
| H  | 1.268409  | 8.259701 | 6.568883  |
| C  | -1.781385 | 4.374572 | 6.047242  |
| C  | -2.827609 | 4.120675 | 7.114183  |
| H  | -3.748337 | 3.700515 | 6.694634  |
| H  | -3.041892 | 5.046745 | 7.655451  |
| C  | -0.911613 | 3.441589 | 8.567273  |
| H  | -0.878942 | 4.488422 | 8.881072  |
| H  | -0.245337 | 3.277540 | 7.712730  |
| H  | -0.643707 | 2.780484 | 9.395782  |
| C  | -3.229463 | 3.184650 | 9.351370  |
| H  | -2.920838 | 2.413698 | 10.063177 |
| H  | -4.257416 | 3.009862 | 9.022209  |
| H  | -3.133783 | 4.178059 | 9.798180  |
| C  | -2.361922 | 1.711500 | 7.585036  |
| H  | -1.772025 | 1.705481 | 6.665449  |
| H  | -3.404937 | 1.457807 | 7.374319  |

|   |           |           |          |
|---|-----------|-----------|----------|
| H | -1.947588 | 1.033031  | 8.335970 |
| O | 0.886908  | 2.115367  | 3.364115 |
| S | 0.140123  | 1.715629  | 2.046775 |
| C | 0.774361  | 0.049540  | 1.723954 |
| H | 0.661733  | -0.562899 | 2.626067 |
| H | 0.202742  | -0.366383 | 0.885285 |
| H | 1.827863  | 0.156415  | 1.446070 |
| C | -1.531435 | 1.245367  | 2.574246 |
| H | -2.067476 | 0.859727  | 1.698631 |
| H | -1.455292 | 0.489570  | 3.364200 |
| H | -1.999181 | 2.162067  | 2.946046 |

6

CH<sub>3</sub>OH

|   |          |          |          |
|---|----------|----------|----------|
| O | 3.391228 | 5.271447 | 2.440298 |
| H | 4.227527 | 5.421267 | 1.959440 |
| C | 3.672723 | 4.299696 | 3.476390 |
| H | 4.424554 | 4.675240 | 4.187262 |
| H | 4.020474 | 3.346270 | 3.050010 |
| H | 2.731354 | 4.128422 | 4.010642 |

10

DMSO

|   |           |           |          |
|---|-----------|-----------|----------|
| S | 8.713472  | 23.444519 | 3.049680 |
| O | 8.630861  | 22.176474 | 3.914482 |
| C | 10.018348 | 23.133506 | 1.814023 |
| H | 10.933676 | 22.822662 | 2.332664 |
| H | 10.179212 | 24.056192 | 1.242357 |
| H | 9.650337  | 22.339401 | 1.155542 |
| C | 9.649441  | 24.667802 | 4.027449 |
| H | 9.031401  | 24.922865 | 4.894955 |
| H | 9.811032  | 25.555370 | 3.402995 |
| H | 10.602354 | 24.222773 | 4.339744 |
